# Supplementary material
Source: Copernicus journal article supplement (doi:10.5194/egusphere-2026-2791)
Supplement: Supplementary file 1 [file egusphere-2026-2791-supplement.pdf]

## **Report. Optically stimulated luminescence profiling and dating of cores TP22-VC03, TP22-VC07 and TP22-VC026**

Tim Kinnaird

*School of Earth and Environmental Sciences, University of St Andrews*

Soetkin Vervust

*Archaeology, Environmental Changes, and Geo-Chemistry (AMGC), Vrije Universiteit Brussel*

Víctor Cartelle, Ruth Plets

*Flanders Marine Institute (VLIZ)*

### **Introduction**

This supplementary data file concerns the optically stimulated luminescence investigations of cores TP22-VC03, TP22-VC07 and TP22-VC26.

### **Methodology**

We utilised a three-stage approach of optically stimulated luminescence profiling and dating (OSL-PD), to appraise the sediment recovered in core from TP22-VC03, TP22-VC07 and TP22-VC26. First, the luminescence properties of bulk sediment sampled directly from core were appraised using portable OSL equipment. This proxy information was used to construct relative luminescence stratigraphies for each core (OSL signal intensities vs depth; figures S1 to S3) and select the most promising positions for dating. Then, a subset of these profiling samples was progressed to calibrated luminescence screening and characterisation in the laboratory, stage 2, to provide a first approximation in the magnitude and range in apparent doses (OSL apparent doses vs depth; figures S1 to S3). Finally, those samples that have significance for interpreting the depositional histories of TP22-VC03, TP22-VC07 and TP22-VC26, coupled with promising attributes in stages 1 and 2, were progressed to dating (stage 3).

#### ***Stage 1: Sample collection and profiling***

Tim Kinnaird visited VLIZ between the 26<sup>th</sup> and 28<sup>th</sup> of January 2023 to sample cores TP22-VC03, TP22-VC07 and TP22-VC26 for OSL-PD. The sediment recovered in core was sampled at ~5-10 cm intervals, with closer resolution sampling across stratigraphic boundaries. 27 samples were taken from TP22-VC03, 23 from TP22-VC07 and 27 from TP22-VC26. Initial screening results using portable OSL equipment (Munyikwa et al., 2021) provided near real-time information on luminescence signal progressions and breaks down core and suggest hypotheses on depositional histories and correlations. The progressions and breaks in OSL net signal intensities down-core are shown in figures S1 to S3 (left-hand plots) and are tabulated in table S1.

#### ***Stage 2: OSL screening and sample selection***

Sample preparation protocols as previously utilised in the luminescence laboratories at School of Earth and Environmental Sciences, University of St Andrews (cf. Turner et al., 2021; Lichtenberger et al., 2019) were used to obtain HF-etched quartz, which was dispensed to disc in duplicate, and subjected to a simplified single-aliquot regenerative dose (SAR) OSL protocol (cf. Turner et al., 2021; Vervust et al. 2020).

OSL measurements were carried out using Risø TL/OSL DA-20 automated dating systems. The readout cycles comprised a natural readout, followed by a nominal 1Gy test dose, then regenerative doses of either ~1.0, 2.4, 4.8 and 19.1 Gy (TP22-VC07 and TP22-VC26) or ~5.4, 10.7, 32.1 and 64.2 Gy (TP22-VC03), and a further 1Gy test dose. The readout cycle also included a zero dose, a repeat dose (equivalent to the first regenerative dose) and an IRSL dose. A 220°C preheat held for 10s was used with 60s OSL measurements using the blue LEDs. Test doses were preheated at the same temperature as the preceding measurement and held for the same duration.

This provided the first, preliminary assessment of luminescence sensitivities (luminescence per unit dose, counts Gy<sup>-1</sup>) and apparent dose estimates (Gy) throughout the sampled stratigraphies. The distributions in apparent dose down-core are shown in figures S1 to S3 (right-hand plots) and are tabulated in table S2. The term apparent dose is used here, to distinguish these values from the equivalent doses that are reported later.

Table S1: IRSL and OSL net signal intensities, IRSL and OSL depletion indices and the IRSL: OSL ratio for cores TP22-VC03, TP22-VC07 and TP22-VC26 ('-', not measured)

| Sample ID    | Depth / cm | IRSL                            |                 | OSL                             |                 | IRSL : OSL ratio |
|--------------|------------|---------------------------------|-----------------|---------------------------------|-----------------|------------------|
|              |            | net signal intensities / counts | Depletion ratio | net signal intensities / counts | Depletion ratio |                  |
| TP22 VC03-1  | 5          | -                               | -               | 2290 ± 60                       | 1.34 ± 0.06     | -                |
| TP22 VC03-2  | 16         | 920 ± 40                        | 1.18 ± 0.09     | 9860 ± 100                      | 1.64 ± 0.03     | 0.0933 ± 0.0046  |
| TP22 VC03-3  | 28         | -                               | -               | 5800 ± 90                       | 1.68 ± 0.05     | -                |
| TP22 VC03-4  | 39         | 270 ± 40                        | 1.32 ± 0.16     | 2900 ± 60                       | 1.64 ± 0.07     | 0.0929 ± 0.0132  |
| TP22 VC03-5  | 48         | 590 ± 40                        | 1.41 ± 0.13     | 5200 ± 80                       | 1.57 ± 0.05     | 0.1130 ± 0.0079  |
| TP22 VC03-6  | 58         | 2050 ± 50                       | 1.03 ± 0.18     | 3390 ± 70                       | 1.51 ± 0.06     | 0.6038 ± 0.0196  |
| TP22 VC03-7  | 68         | 4830 ± 80                       | 1.17 ± 0.04     | 46700 ± 220                     | 1.66 ± 0.02     | 0.1035 ± 0.0017  |
| TP22 VC03-8  | 78         | 1330 ± 50                       | 1.36 ± 0.09     | 10830 ± 110                     | 1.80 ± 0.04     | 0.1228 ± 0.0046  |
| TP22 VC03-9  | 88         | 310 ± 30                        | 0.91 ± 0.12     | 2080 ± 60                       | 1.63 ± 0.08     | 0.1488 ± 0.0171  |
| TP22 VC03-10 | 98         | 3230 ± 70                       | 1.23 ± 0.05     | 20840 ± 150                     | 1.77 ± 0.03     | 0.1548 ± 0.0033  |
| TP22 VC03-11 | 108        | 360 ± 40                        | 1.29 ± 0.16     | 4340 ± 70                       | 1.62 ± 0.05     | 0.0830 ± 0.0085  |
| TP22 VC03-12 | 118        | 290 ± 40                        | 2.57 ± 0.33     | 3360 ± 70                       | 1.52 ± 0.06     | 0.0861 ± 0.0112  |
| TP22 VC03-13 | 127        | 1670 ± 50                       | 1.41 ± 0.08     | 14810 ± 130                     | 1.56 ± 0.03     | 0.1130 ± 0.0036  |
| TP22 VC03-14 | 137        | 290 ± 30                        | 1.07 ± 0.14     | 3160 ± 60                       | 1.65 ± 0.06     | 0.0905 ± 0.0111  |
| TP22 VC03-15 | 141        | 13630 ± 120                     | 1.27 ± 0.02     | 156240 ± 400                    | 1.57 ± 0.01     | 0.0872 ± 0.0008  |
| TP22 VC03-16 | 148        | 23180 ± 160                     | 1.27 ± 0.02     | 320480 ± 570                    | 1.54 ± 0.01     | 0.0723 ± 0.0005  |
| TP22 VC03-17 | 154        | 69670 ± 270                     | 1.23 ± 0.01     | 844270 ± 920                    | 1.72 ± 0.01     | 0.0825 ± 0.0003  |
| TP22 VC03-18 | 162        | 95530 ± 310                     | 1.22 ± 0.01     | 1231500 ± 1110                  | 1.72 ± 0.01     | 0.0776 ± 0.0003  |
| TP22 VC03-19 | 170        | 606790 ± 780                    | 1.25 ± 0.01     | 6173740 ± 2490                  | 1.77 ± 0.01     | 0.0983 ± 0.0001  |
| TP22 VC03-20 | 177        | 1302800 ± 1150                  | 1.28 ± 0.01     | 11398010 ± 3390                 | 1.91 ± 0.01     | 0.1143 ± 0.0001  |
| TP22 VC03-21 | 187.5      | 1415830 ± 1200                  | 1.27 ± 0.01     | 12001190 ± 3470                 | 1.92 ± 0.01     | 0.1180 ± 0.0001  |
| TP22 VC03-22 | 194.5      | 493270 ± 710                    | 1.27 ± 0.01     | 5075200 ± 2260                  | 1.92 ± 0.01     | 0.0972 ± 0.0001  |
| TP22 VC03-23 | 200.5      | 489900 ± 700                    | 1.25 ± 0.01     | 5200860 ± 2290                  | 1.79 ± 0.01     | 0.0942 ± 0.0001  |
| TP22 VC03-24 | 208.5      | 941900 ± 970                    | 1.29 ± 0.01     | 8762360 ± 2970                  | 1.89 ± 0.01     | 0.1075 ± 0.0001  |
| TP22 VC03-25 | 217.5      | 1172330 ± 1090                  | 1.25 ± 0.01     | 12116280 ± 3490                 | 1.79 ± 0.01     | 0.0968 ± 0.0001  |
| TP22 VC03-26 | 224.5      | 764780 ± 880                    | 1.18 ± 0.01     | 7991700 ± 2830                  | 1.91 ± 0.01     | 0.0957 ± 0.0001  |
| TP22 VC03-27 | 232.5      | 743750 ± 870                    | 1.28 ± 0.01     | 7363760 ± 2720                  | 1.90 ± 0.01     | 0.1010 ± 0.0001  |
| TP22 VC07-1  | 10         | 700 ± 40                        | 1.24 ± 0.11     | 20890 ± 150                     | 1.24 ± 0.02     | 0.0336 ± 0.0021  |
| TP22 VC07-2  | 17         | 6640 ± 90                       | 1.05 ± 0.13     | 24320 ± 160                     | 1.36 ± 0.02     | 0.2728 ± 0.004   |
| TP22 VC07-3  | 23.5       | 5760 ± 80                       | 1.37 ± 0.04     | 72680 ± 270                     | 1.96 ± 0.02     | 0.0793 ± 0.0012  |
| TP22 VC07-4  | 33.5       | 10540 ± 110                     | 1.34 ± 0.03     | 102530 ± 320                    | 1.85 ± 0.01     | 0.1028 ± 0.0011  |
| TP22 VC07-5  | 43.5       | 7520 ± 90                       | 1.32 ± 0.03     | 90010 ± 300                     | 1.99 ± 0.01     | 0.0835 ± 0.0011  |
| TP22 VC07-6  | 52.5       | 6870 ± 90                       | 1.31 ± 0.03     | 69670 ± 270                     | 1.79 ± 0.01     | 0.0986 ± 0.0013  |
| TP22 VC07-7  | 63.5       | 6370 ± 90                       | 1.36 ± 0.04     | 79270 ± 280                     | 1.82 ± 0.01     | 0.0803 ± 0.0011  |
| TP22 VC07-8  | 73.5       | 7540 ± 90                       | 1.29 ± 0.03     | 70600 ± 270                     | 1.81 ± 0.01     | 0.1067 ± 0.0014  |
| TP22 VC07-9  | 83.5       | 20530 ± 150                     | 1.24 ± 0.03     | 112350 ± 340                    | 2.00 ± 0.01     | 0.1827 ± 0.0014  |
| TP22 VC07-10 | 93.5       | 7100 ± 90                       | 1.30 ± 0.03     | 101410 ± 320                    | 2.21 ± 0.02     | 0.0700 ± 0.0009  |
| TP22 VC07-11 | 103.5      | 5000 ± 80                       | 1.32 ± 0.04     | 70030 ± 270                     | 1.83 ± 0.01     | 0.0713 ± 0.0011  |
| TP22 VC07-12 | 112.5      | 6440 ± 90                       | 1.30 ± 0.03     | 62130 ± 250                     | 1.80 ± 0.02     | 0.1036 ± 0.0015  |
| TP22 VC07-13 | 116.5      | 7850 ± 90                       | 1.27 ± 0.03     | 77560 ± 280                     | 1.76 ± 0.01     | 0.1012 ± 0.0013  |
| TP22 VC07-14 | 125        | 12530 ± 120                     | 1.42 ± 0.03     | 113340 ± 340                    | 1.91 ± 0.01     | 0.1105 ± 0.0011  |
| TP22 VC07-15 | 134        | 9130 ± 100                      | 1.38 ± 0.03     | 82860 ± 290                     | 1.90 ± 0.01     | 0.1102 ± 0.0013  |
| TP22 VC07-16 | 144        | 6940 ± 90                       | 1.31 ± 0.03     | 70040 ± 270                     | 1.89 ± 0.02     | 0.0991 ± 0.0013  |
| TP22 VC07-17 | 154        | 7870 ± 100                      | 1.31 ± 0.03     | 82020 ± 290                     | 1.81 ± 0.01     | 0.0959 ± 0.0012  |
| TP22 VC07-18 | 164        | 11610 ± 110                     | 1.30 ± 0.02     | 115770 ± 340                    | 1.89 ± 0.01     | 0.1003 ± 0.0010  |

|               |       |             |             |                |             |                 |
|---------------|-------|-------------|-------------|----------------|-------------|-----------------|
| TP22 VC07-19  | 174   | 8910 ± 100  | 1.33 ± 0.03 | 94880 ± 310    | 1.87 ± 0.01 | 0.0939 ± 0.0011 |
| TP22 VC07-20  | 184   | 12040 ± 120 | 1.28 ± 0.02 | 119490 ± 350   | 1.94 ± 0.01 | 0.1007 ± 0.0010 |
| TP22 VC07-21  | 194   | 11750 ± 110 | 1.34 ± 0.03 | 106570 ± 330   | 1.85 ± 0.01 | 0.1103 ± 0.0011 |
| TP22 VC07-22  | 204   | 8050 ± 90   | 1.30 ± 0.03 | 84250 ± 290    | 1.90 ± 0.01 | 0.0955 ± 0.0012 |
| TP22 VC07-23  | 209   | 8080 ± 100  | 1.31 ± 0.03 | 81010 ± 290    | 1.90 ± 0.01 | 0.0998 ± 0.0012 |
| TP22 VC026-1  | 10    | -           | -           | 13390 ± 120    | 1.29 ± 0.02 | -               |
| TP22 VC026-2  | 19    | -           | -           | 30810 ± 180    | 1.45 ± 0.02 | -               |
| TP22 VC026-3  | 27.5  | -           | -           | 114310 ± 340   | 1.78 ± 0.01 | -               |
| TP22 VC026-4  | 35.5  | -           | -           | 112980 ± 340   | 1.78 ± 0.01 | -               |
| TP22 VC026-5  | 42.5  | -           | -           | 157110 ± 400   | 1.80 ± 0.01 | -               |
| TP22 VC026-6  | 50.5  | 9490 ± 100  | 1.26 ± 0.03 | 124800 ± 360   | 1.76 ± 0.01 | 0.0760 ± 0.0009 |
| TP22 VC026-7  | 56.5  | 11720 ± 110 | 1.27 ± 0.02 | 155620 ± 400   | 1.84 ± 0.01 | 0.0753 ± 0.0007 |
| TP22 VC026-8  | 61.5  | 5920 ± 80   | 1.3 ± 0.04  | 79330 ± 280    | 1.75 ± 0.01 | 0.0746 ± 0.0011 |
| TP22 VC026-9  | 70.5  | 12740 ± 120 | 1.28 ± 0.02 | 150870 ± 390   | 1.74 ± 0.01 | 0.0845 ± 0.0008 |
| TP22 VC026-10 | 80.5  | 13700 ± 120 | 1.32 ± 0.02 | 176880 ± 420   | 1.78 ± 0.01 | 0.0775 ± 0.0007 |
| TP22 VC026-11 | 90.5  | 11610 ± 110 | 1.32 ± 0.03 | 146640 ± 380   | 1.78 ± 0.01 | 0.0792 ± 0.0008 |
| TP22 VC026-12 | 100.5 | 14010 ± 120 | 1.25 ± 0.02 | 158460 ± 400   | 1.62 ± 0.01 | 0.0884 ± 0.0008 |
| TP22 VC026-13 | 110.5 | 6070 ± 80   | 1.23 ± 0.03 | 81700 ± 290    | 1.78 ± 0.01 | 0.0743 ± 0.0011 |
| TP22 VC026-14 | 117.5 | 8270 ± 100  | 1.31 ± 0.03 | 119420 ± 350   | 1.65 ± 0.01 | 0.0692 ± 0.0008 |
| TP22 VC026-15 | 123   | 4200 ± 70   | 1.17 ± 0.04 | 83840 ± 290    | 1.48 ± 0.01 | 0.0501 ± 0.0009 |
| TP22 VC026-16 | 129   | 15370 ± 130 | 1.24 ± 0.02 | 209680 ± 460   | 1.60 ± 0.01 | 0.0733 ± 0.0006 |
| TP22 VC026-17 | 133   | 6880 ± 90   | 1.25 ± 0.03 | 141170 ± 380   | 1.40 ± 0.01 | 0.0488 ± 0.0006 |
| TP22 VC026-18 | 139   | 6100 ± 80   | 1.26 ± 0.03 | 123580 ± 350   | 1.35 ± 0.01 | 0.0494 ± 0.0007 |
| TP22 VC026-19 | 150   | -           | -           | -              | -           | -               |
| TP22 VC026-20 | 158   | -           | -           | 273950 ± 530   | 1.30 ± 0.01 | -               |
| TP22 VC026-21 | 166   | -           | -           | 262530 ± 510   | 1.48 ± 0.01 | -               |
| TP22 VC026-22 | 170   | -           | -           | 258500 ± 510   | 1.71 ± 0.01 | -               |
| TP22 VC026-23 | 177   | -           | -           | 1062960 ± 1030 | 2.07 ± 0.01 | -               |
| TP22 VC026-24 | 184   | -           | -           | 944640 ± 970   | 2.03 ± 0.01 | -               |
| TP22 VC026-25 | 195   | -           | -           | 706500 ± 840   | 1.98 ± 0.01 | -               |
| TP22 VC026-26 | 201   | -           | -           | 723100 ± 850   | 2.03 ± 0.01 | -               |
| TP22 VC026-27 | 207   | -           | -           | 746990 ± 870   | 1.92 ± 0.01 | -               |

Table S2: Distributions in apparent doses through cores TP22-VC03 (CERSA1202), TP22-VC07 (CERSA1200) and TP22-VC26 (CERSA1198)

| Lab ID       | Depth /cm | Apparent dose / Gy |               | Sensitivity / counts Gy <sup>-1</sup> |           | Apparent dose / Gy mean | Sensitivity / counts Gy <sup>-1</sup> mean |
|--------------|-----------|--------------------|---------------|---------------------------------------|-----------|-------------------------|--------------------------------------------|
|              |           | Aliquot 1          | Aliquot 2     | Aliquot 1                             | Aliquot 2 |                         |                                            |
| CERSA1202/6  | 58        | -                  | 0.18 ± 0.10   | 220 ± 10                              | 640 ± 30  | 0.18 ± 0.10             | 430 ± 210                                  |
| CERSA1202/7  | 68        | 0.21 ± 0.13        | 0.05 ± 0.05   | 380 ± 20                              | 960 ± 30  | 0.13 ± 0.08             | 670 ± 290                                  |
| CERSA1202/8  | 78        | 2.94 ± 0.62        | 0.31 ± 0.04   | 160 ± 10                              | 1870 ± 40 | 1.62 ± 1.31             | 1010 ± 850                                 |
| CERSA1202/9  | 88        | 0.24 ± 0.04        | 0.18 ± 0.10   | 1250 ± 40                             | 530 ± 20  | 0.21 ± 0.03             | 890 ± 360                                  |
| CERSA1202/10 | 98        | 0.09 ± 0.07        | 1.09 ± 2.74   | 1140 ± 30                             | 30 ± 10   | 0.59 ± 0.50             | 590 ± 560                                  |
| CERSA1202/11 | 108       | 7.35 ± 1.40        | 1.07 ± 0.43   | 200 ± 10                              | 130 ± 10  | 4.21 ± 3.14             | 170 ± 30                                   |
| CERSA1202/12 | 118       | 0.35 ± 0.17        | 7.84 ± 0.46   | 310 ± 20                              | 930 ± 30  | 4.10 ± 3.74             | 620 ± 310                                  |
| CERSA1202/13 | 127       | 0.17 ± 0.30        | 0.50 ± 0.04   | 130 ± 10                              | 1780 ± 40 | 0.34 ± 0.17             | 950 ± 830                                  |
| CERSA1202/14 | 137       | 0.33 ± 0.03        | 0.41 ± 0.13   | 2170 ± 50                             | 380 ± 20  | 0.37 ± 0.04             | 1270 ± 890                                 |
| CERSA1202/15 | 141       | 0.84 ± 0.10        | 1.00 ± 0.23   | 560 ± 20                              | 270 ± 20  | 0.92 ± 0.08             | 420 ± 140                                  |
| CERSA1202/16 | 148       | 3.10 ± 0.16        | 19.83 ± 2.01  | 1430 ± 40                             | 530 ± 20  | 11.46 ± 8.36            | 980 ± 450                                  |
| CERSA1202/17 | 154       | 3.01 ± 0.12        | 4.54 ± 0.19   | 3190 ± 60                             | 2190 ± 50 | 3.78 ± 0.76             | 2690 ± 500                                 |
| CERSA1202/18 | 162       | 27.84 ± 1.94       | 4.30 ± 0.43   | 1000 ± 30                             | 420 ± 20  | 16.07 ± 11.77           | 710 ± 290                                  |
| CERSA1202/19 | 170       | 10.04 ± 0.24       | 89.15 ± 11.99 | 15290 ± 120                           | 5190 ± 70 | 49.6 ± 39.56            | 10240 ± 5050                               |
| CERSA1202/20 | 177       | 34.39 ± 1.45       | 59.29 ± 2.65  | 9890 ± 100                            | 6330 ± 80 | 46.84 ± 12.45           | 8110 ± 1780                                |
| CERSA1202/21 | 187.5     | 54.93 ± 6.04       | 50.12 ± 2.92  | 1630 ± 40                             | 4350 ± 70 | 52.53 ± 2.41            | 2990 ± 1360                                |
| CERSA1202/22 | 194.5     | 247.0 ± 260.8      | 128.5 ± 25.8  | 2240 ± 50                             | 890 ± 30  | 187.7 ± 59.3            | 1560 ± 670                                 |
| CERSA1202/23 | 200.5     | 57.59 ± 5.69       | 104.5 ± 13.4  | 1420 ± 40                             | 820 ± 30  | 81.03 ± 23.44           | 1120 ± 300                                 |
| CERSA1202/24 | 208.5     | 31.38 ± 1.25       | 77.31 ± 8.06  | 10920 ± 100                           | 1780 ± 40 | 54.35 ± 22.97           | 6350 ± 4570                                |

|              |       |              |              |             |             |               |              |
|--------------|-------|--------------|--------------|-------------|-------------|---------------|--------------|
| CERSA1202/25 | 217.5 | 59.5 ± 2.99  | 66.53 ± 3.66 | 14160 ± 120 | 9890 ± 100  | 63.02 ± 3.51  | 12020 ± 2140 |
| CERSA1202/26 | 224.5 | 43.26 ± 3.32 | 98.07 ± 6.72 | 5470 ± 70   | 10680 ± 100 | 70.66 ± 27.4  | 8080 ± 2600  |
| CERSA1202/27 | 232.5 | 43.09 ± 4.06 | 70.35±12.66  | 1000 ± 30   | 400 ± 20    | 56.72 ± 13.63 | 700 ± 300    |
| CERSA1200/5  | 43.5  | -            | -            | -           | -           | -             | -            |
| CERSA1200/6  | 52.5  | 0.40 ± 0.03  | 0.65 ± 0.08  | 3520 ± 60   | 1580 ± 40   | 0.52 ± 0.12   | 2550 ± 970   |
| CERSA1200/7  | 63.5  | 0.84 ± 0.14  | 0.56 ± 0.08  | 510 ± 20    | 670 ± 30    | 0.70 ± 0.14   | 590 ± 80     |
| CERSA1200/8  | 73.5  | 0.04 ± 0.26  | 0.68 ± 0.08  | 270 ± 20    | 940 ± 30    | 0.36 ± 0.32   | 610 ± 330    |
| CERSA1200/9  | 83.5  | 0.43 ± 0.23  | 0.54 ± 0.17  | 190 ± 10    | 400 ± 20    | 0.48 ± 0.06   | 290 ± 110    |
| CERSA1200/10 | 93.5  | 0.32 ± 0.14  | 0.76 ± 0.04  | 430 ± 20    | 2690 ± 50   | 0.54 ± 0.22   | 1560 ± 1130  |
| CERSA1200/11 | 103.5 | 0.80 ± 0.21  | 0.86 ± 0.03  | 280 ± 20    | 8480 ± 90   | 0.83 ± 0.03   | 4380 ± 4100  |
| CERSA1200/12 | 112.5 | 0.68 ± 0.10  | 0.62 ± 0.09  | 690 ± 30    | 920 ± 30    | 0.65 ± 0.03   | 800 ± 110    |
| CERSA1200/13 | 116.5 | 1.28 ± 0.05  | 0.89 ± 0.04  | 2570 ± 50   | 3280 ± 60   | 1.08 ± 0.2    | 2930 ± 360   |
| CERSA1200/14 | 125   | 0.75 ± 0.07  | 1.01 ± 0.28  | 1130 ± 30   | 270 ± 20    | 0.88 ± 0.13   | 700 ± 430    |
| CERSA1200/15 | 134   | 0.62 ± 0.15  | 0.42 ± 0.13  | 280 ± 20    | 380 ± 20    | 0.52 ± 0.1    | 330 ± 50     |
| CERSA1200/16 | 144   | 0.96 ± 0.05  | 0.66 ± 0.03  | 2920 ± 50   | 2430 ± 50   | 0.81 ± 0.15   | 2670 ± 240   |
| CERSA1200/17 | 154   | 0.72 ± 0.04  | 0.72 ± 0.06  | 2950 ± 50   | 890 ± 30    | 0.72 ± 0      | 1920 ± 1030  |
| CERSA1200/18 | 164   | 0.88 ± 0.05  | 0.70 ± 0.04  | 1480 ± 40   | 2190 ± 50   | 0.79 ± 0.09   | 1830 ± 360   |
| CERSA1200/19 | 174   | 0.69 ± 0.04  | 0.65 ± 0.15  | 2470 ± 50   | 390 ± 20    | 0.67 ± 0.02   | 1430 ± 1040  |
| CERSA1200/20 | 184   | 0.82 ± 0.15  | 0.79 ± 0.10  | 350 ± 20    | 560 ± 20    | 0.8 ± 0.02    | 450 ± 100    |
| CERSA1200/21 | 194   | 0.84 ± 0.03  | 0.61 ± 0.04  | 6930 ± 80   | 2430 ± 50   | 0.72 ± 0.11   | 4680 ± 2250  |
| CERSA1200/22 | 204   | 0.84 ± 0.07  | 0.51 ± 0.09  | 1370 ± 40   | 570 ± 20    | 0.67 ± 0.16   | 970 ± 400    |
| CERSA1200/23 | 209   | 1.05 ± 0.10  | 1.55 ± 0.07  | 1360 ± 40   | 6210 ± 80   | 1.3 ± 0.25    | 3790 ± 2430  |
| CERSA1198/4  | 35.5  | 0.75 ± 0.07  | 0.85 ± 0.2   | 800 ± 30    | 210 ± 10    | 0.80 ± 0.05   | 510 ± 300    |
| CERSA1198/5  | 42.5  | 0.50 ± 0.05  | 0.90 ± 0.11  | 960 ± 30    | 750 ± 30    | 0.70 ± 0.20   | 850 ± 100    |
| CERSA1198/6  | 50.5  | 0.83 ± 0.03  | 0.84 ± 0.10  | 20230 ± 140 | 560 ± 20    | 0.84 ± 0.01   | 10390 ± 9830 |
| CERSA1198/7  | 56.5  | 0.91 ± 0.06  | 0.81 ± 0.03  | 2500 ± 50   | 3730 ± 60   | 0.86 ± 0.05   | 3120 ± 620   |
| CERSA1198/8  | 61.5  | 1.10 ± 0.23  | 0.96 ± 0.13  | 210 ± 10    | 530 ± 20    | 1.03 ± 0.07   | 370 ± 160    |
| CERSA1198/9  | 70.5  | 0.98 ± 0.08  | 1.15 ± 0.05  | 1380 ± 40   | 5340 ± 70   | 1.07 ± 0.08   | 3360 ± 1980  |
| CERSA1198/10 | 80.5  | 1.02 ± 0.07  | 1.21 ± 0.26  | 1810 ± 40   | 150 ± 10    | 1.11 ± 0.1    | 980 ± 830    |
| CERSA1198/11 | 90.5  | 0.89 ± 0.03  | 0.83 ± 0.04  | 4890 ± 70   | 5080 ± 70   | 0.86 ± 0.03   | 4990 ± 100   |
| CERSA1198/12 | 100.5 | 0.87 ± 0.07  | 0.96 ± 0.05  | 1260 ± 40   | 2340 ± 50   | 0.92 ± 0.05   | 1800 ± 540   |
| CERSA1198/13 | 110.5 | 0.70 ± 0.07  | 1.32 ± 0.26  | 1080 ± 30   | 160 ± 10    | 1.01 ± 0.31   | 620 ± 460    |
| CERSA1198/14 | 117.5 | 11.06 ± 1.93 | 0.78 ± 0.05  | 430 ± 20    | 1950 ± 40   | 5.92 ± 5.14   | 1190 ± 760   |
| CERSA1198/15 | 123   | 1.17 ± 0.55  | 2.73 ± 1.18  | 120 ± 10    | 70 ± 10     | 1.95 ± 0.78   | 100 ± 20     |
| CERSA1198/16 | 129   | 1.02 ± 0.11  | 0.98 ± 0.41  | 580 ± 20    | 150 ± 10    | 1 ± 0.02      | 360 ± 220    |
| CERSA1198/17 | 133   | 0.89 ± 0.09  | 0.61 ± 0.02  | 650 ± 30    | 14760 ± 120 | 0.75 ± 0.14   | 7710 ± 7060  |
| CERSA1198/18 | 139   | 0.82 ± 0.61  | 0.85 ± 0.14  | 60 ± 10     | 370 ± 20    | 0.84 ± 0.02   | 220 ± 150    |
| CERSA1198/19 | 150   | 0.40 ± 0.09  | 1.02 ± 0.13  | 550 ± 20    | 460 ± 20    | 0.71 ± 0.31   | 500 ± 40     |
| CERSA1198/20 | 158   | 0.62 ± 0.04  | 0.7 ± 0.08   | 1820 ± 40   | 950 ± 30    | 0.66 ± 0.04   | 1390 ± 440   |
| CERSA1198/21 | 166   | 0.73 ± 0.11  | 0.98 ± 0.23  | 450 ± 20    | 230 ± 20    | 0.85 ± 0.13   | 340 ± 110    |
| CERSA1198/22 | 170   | 5.10 ± 1.68  | 2.73 ± 0.4   | 110 ± 10    | 250 ± 20    | 3.91 ± 1.19   | 180 ± 70     |
| CERSA1198/23 | 177   | 7.37 ± 1.00  | 5.20 ± 0.52  | 480 ± 20    | 500 ± 20    | 6.28 ± 1.08   | 490 ± 10     |
| CERSA1198/24 | 184   | 3.94 ± 0.50  | 5.10 ± 0.25  | 410 ± 20    | 1340 ± 40   | 4.52 ± 0.58   | 870 ± 470    |
| CERSA1198/25 | 195   | 8.53 ± 1.06  | 7.86 ± 1.54  | 1400 ± 40   | 170 ± 10    | 8.19 ± 0.33   | 780 ± 620    |
| CERSA1198/26 | 201   | 4.26 ± 0.38  | 6.08 ± 0.97  | 840 ± 30    | 920 ± 30    | 5.17 ± 0.91   | 880 ± 40     |
| CERSA1198/27 | 207   | 4.73 ± 0.57  | 4.24 ± 0.48  | 330 ± 20    | 920 ± 30    | 4.49 ± 0.25   | 630 ± 300    |

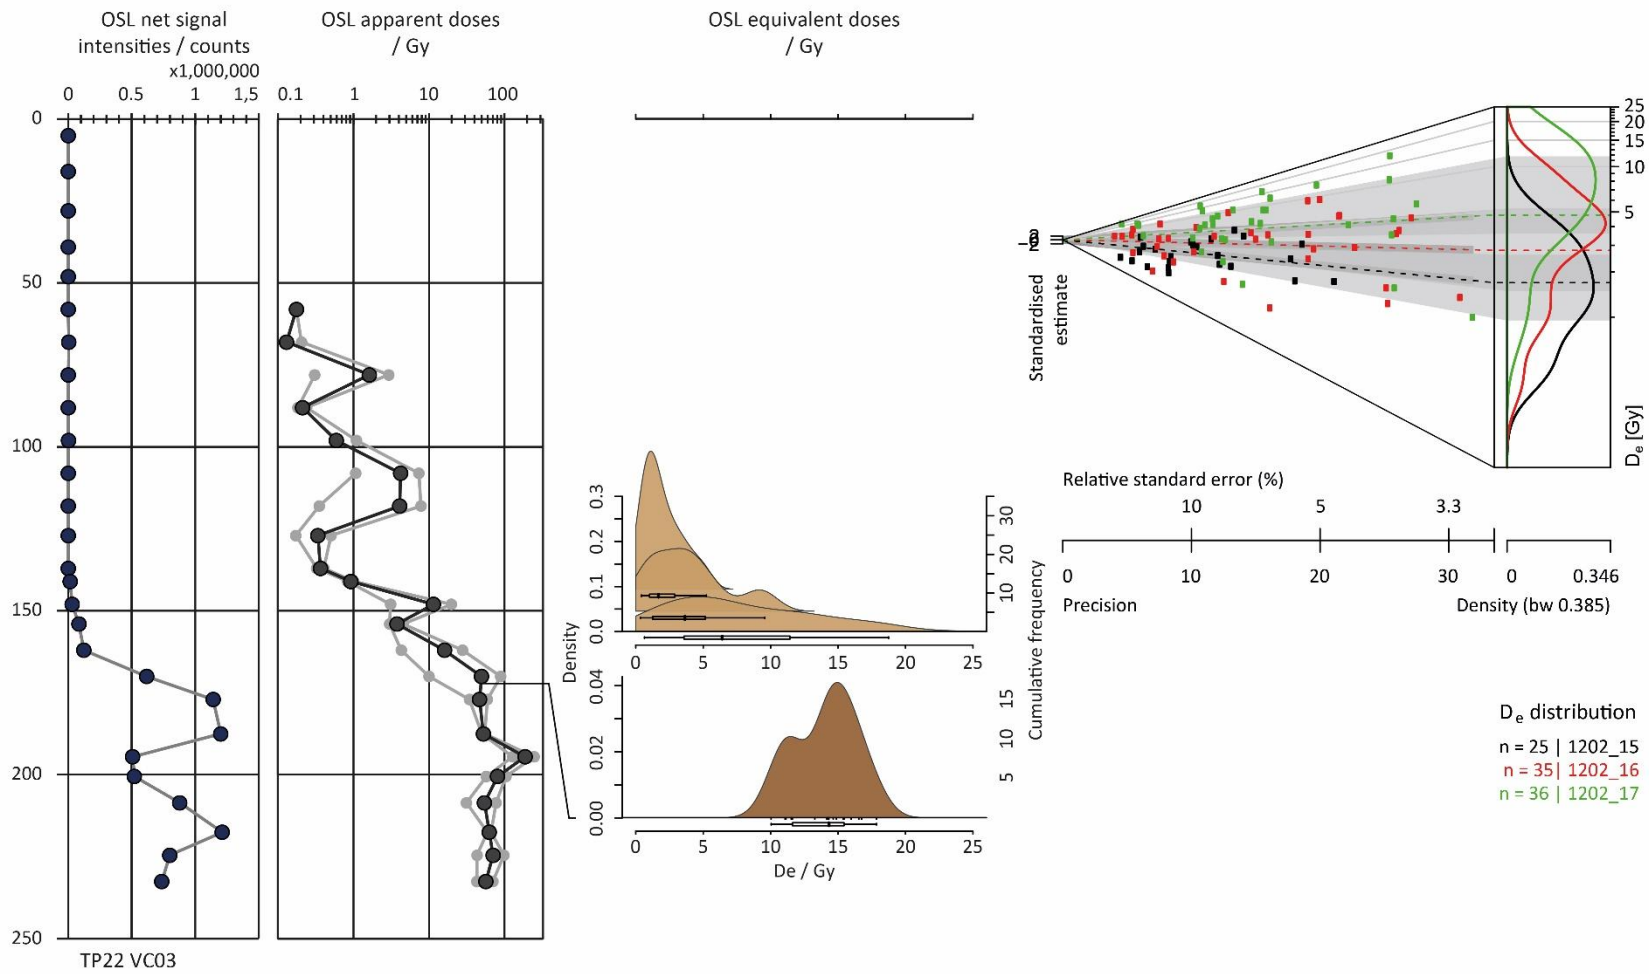

Figure S1: TP22-VC03 (CERSA1202 and 1203)

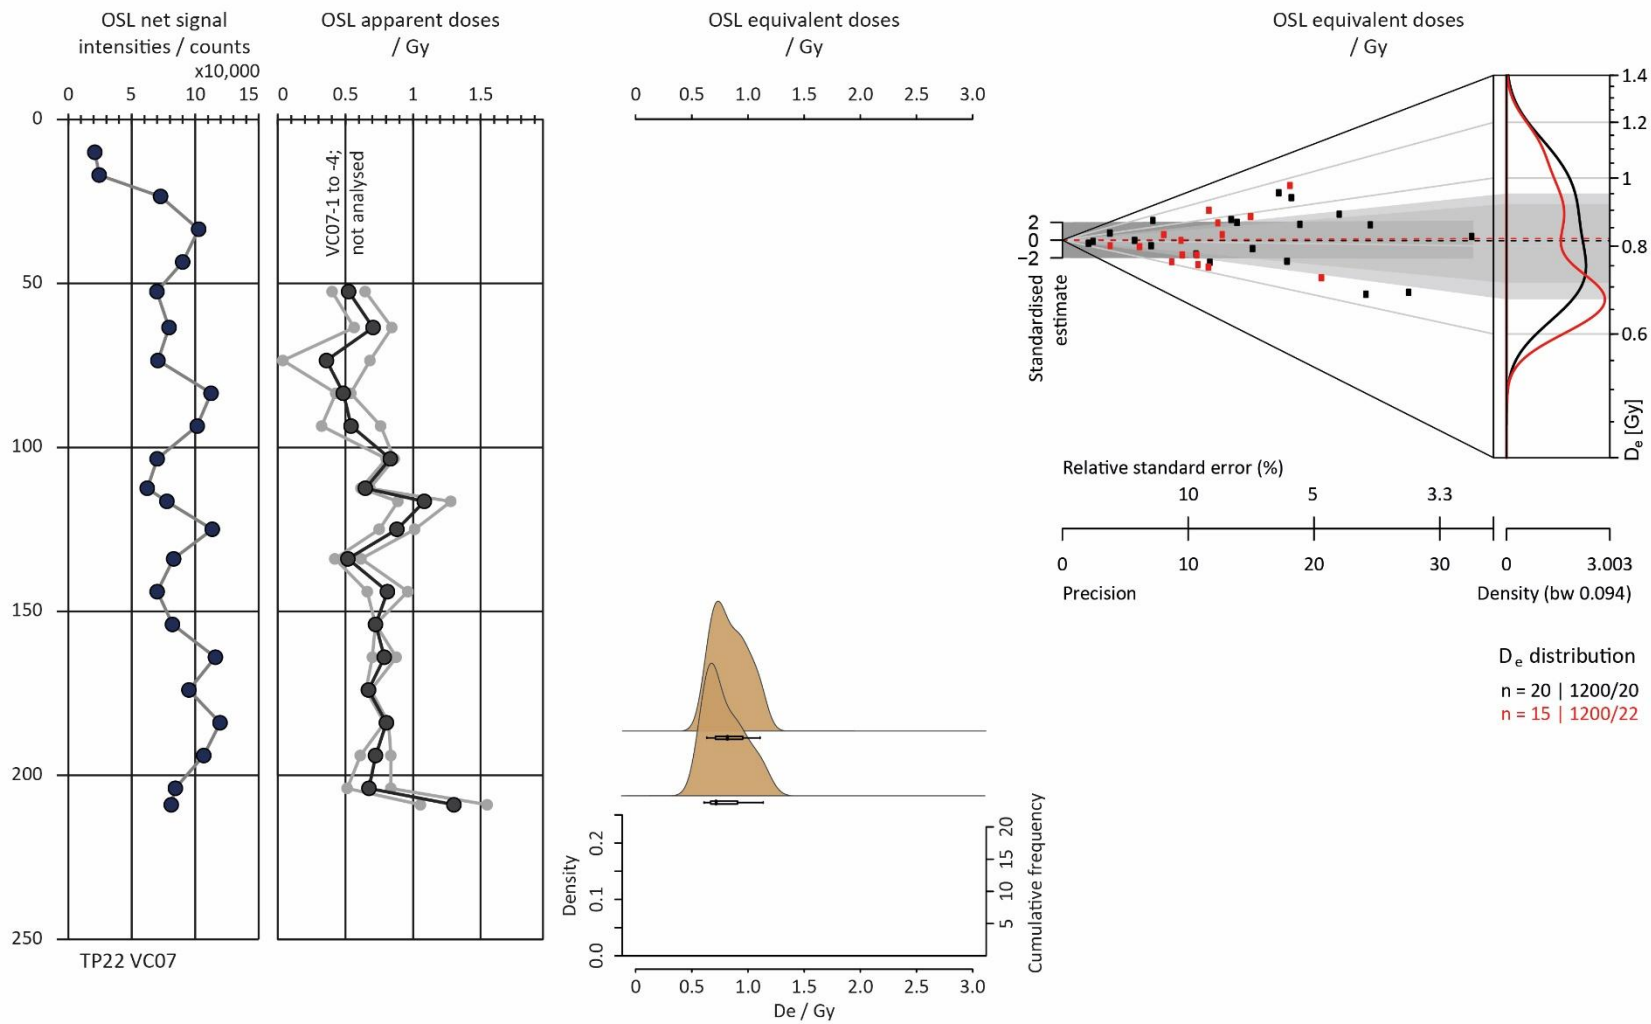

Figure S2: TP22-VC07 (CERSA1200 and 1201)

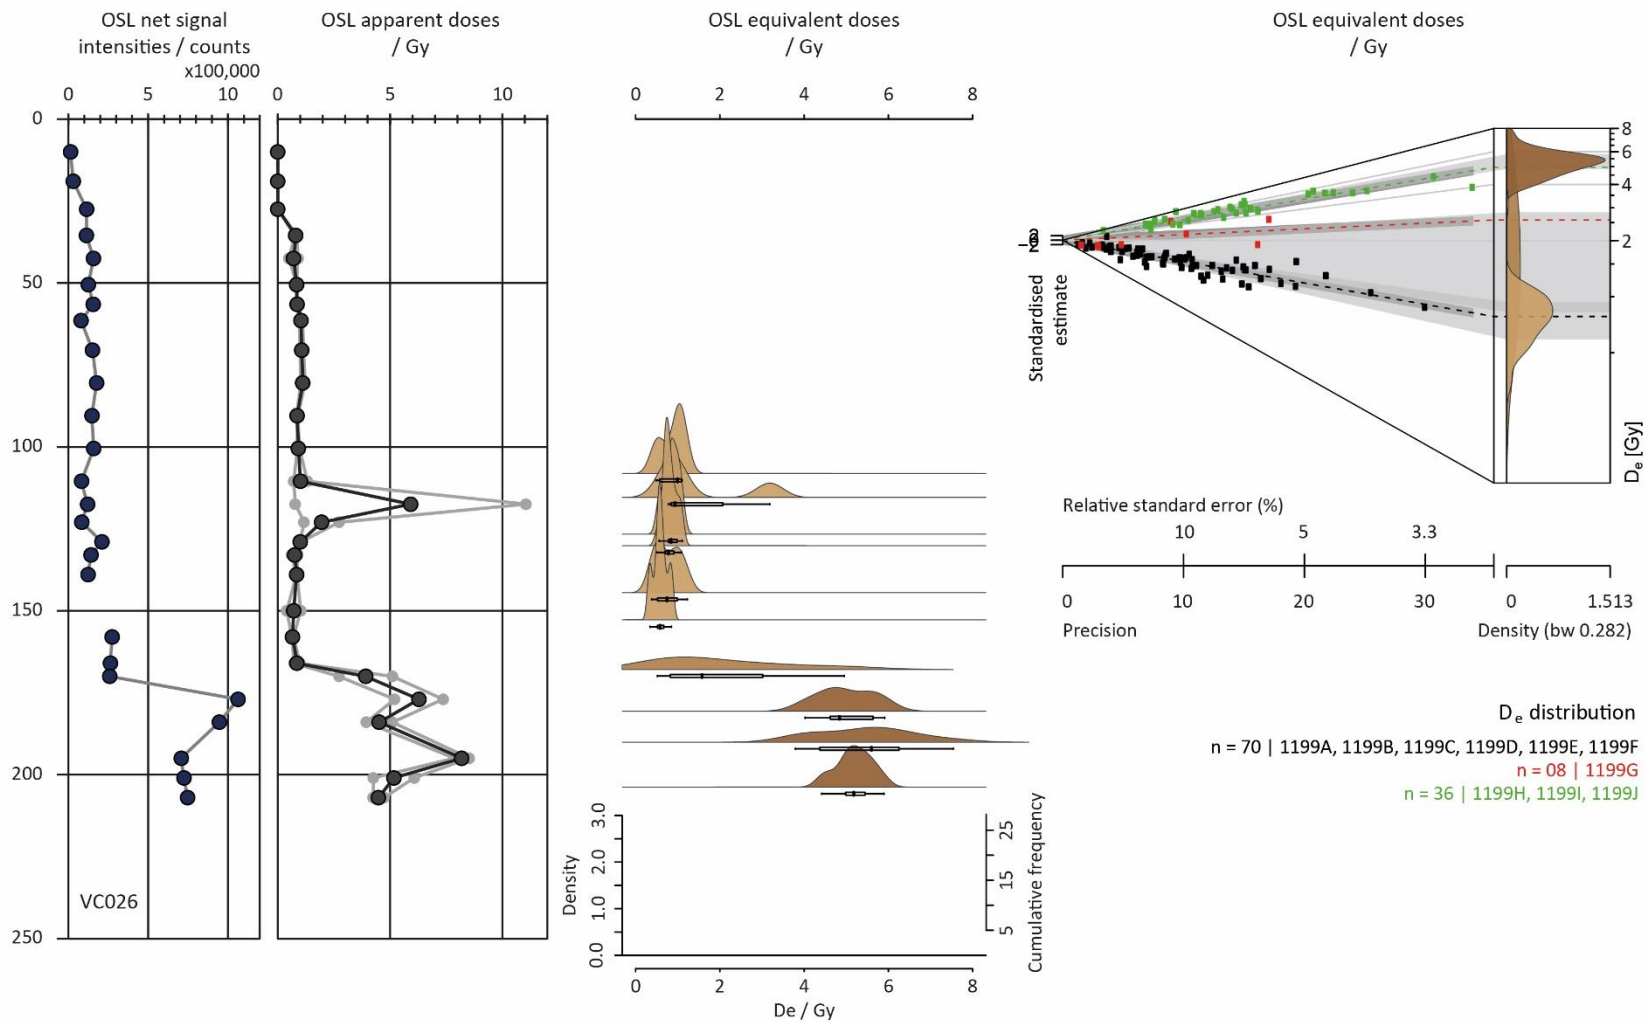

Figure S3: TP22-VC26 (CERSA1998 and 1999)

### Stage 3: Quartz SAR OSL dating

A luminescence age is the quotient of the burial dose (in Gy) over the effective environmental dose rate (in mGy a<sup>-1</sup>). Here, equivalent dose (De) determinations – used to estimate the burial dose - were made on sets of ~24 aliquots using the single aliquot regenerative dose (SAR) OSL protocol. The dose rates to these sediments were assessed using the combination of low-level radioactivity measurements in the laboratory, and determinations of radionuclide concentrations by mass spectrometry.

*Equivalent dose determinations.* Mineral separation procedures similar to those used by (Kinnaird et al., 2017) were used to extract HF-etched 'quartz' from all samples. Samples were wet sieved to obtain the 90 to 250 µm fractions. These fractions were then treated in 1M HCl for 10 minutes, 40% HF for 40 minutes, and a further 1M HCl for 10 minutes. The 90 to 250 µm, HF-etched fractions were density separated in LST fast float solutions of 2.64 and 2.74 gcm<sup>-3</sup>. The 90-250 µm, HF-etched, 2.64-2.74 gcm<sup>-3</sup> fractions were re-sieved at 150 µm, and the 150-250 µm fractions dispensed to 10mm stainless steel discs for measurement. OSL measurements were carried out using a Risø TL/OSL DA-20 automated dating system.

Data reduction and De determinations were made in Luminescence Analyst v.4.31.9 and the package Luminescence in R. Individual decay curves were scrutinised for shape and consistency. Dose response curves were fitted with an exponential function, with the growth curve fitted through zero and the repeat recycling points. Error analysis was determined by Monte Carlo Stimulation.

Aliquots satisfying the following criteria were accepted for assimilation of Des: 1) recuperation of less than 5 %; 2) recycling ratio within 10 % of unity, including uncertainties (Murray and Wintle, 2003); 3) OSL IR depletion ratio within 10 % of unity (Duller, 2003) and 4) test dose signals 3σ greater than background levels.

*Equivalent dose distributions.* The equivalent dose distributions for the samples taken forward to dating from cores TP22-VC03, TP22-VC07 and TP22-VC26 are shown as kernel density estimate (KDE) and Abanico plots in figures S1 to S3. The complexity to these distributions varies by core and, by position in the sequence:

- TP22-VC03: sampling the oldest part of the sand body: samples CERSA1202-15, -16 and -17 show the greatest complexity, with distributions ranging from the sub-Gy to in excess of 5 Gy and overdispersions > 50%;
- TP22-VC07: sampling the most recent erosional event / youngest part of the sand body: samples CERSA1200-20 and -22 have tighter distributions, ranging between 0.6 and 1.1 Gy and overdispersions in the range 16-18%;
- TP22-VC26: samples CERSA1998-A to J show a range of distributions, from tight to broad with overdispersions ~9 to 60 %.

For age assimilation below, the **weighted mean** and standard deviation of the distribution were used in determining depositional ages.

*Radionuclide concentrations and Environmental dose rates.* Radionuclide concentrations of <sup>232</sup>Th, <sup>238</sup>U and <sup>40</sup>K were determined from inductively coupled plasma mass spectrometry (ICP-MS; U, Th) and inductively coupled plasma optical emission spectrometry (ICP-OES; K) at Chemostrat's Welshpool Laboratory (Table S3). Infinite matrix dose rates were calculated from these using the conversion factors of Guérin et al. (2011) and adjusted for attenuation by grain size and chemical etching using the datasets of Guérin et al. (2012) and Bell (1979) respectively (Table S4).

Activity concentrations of <sup>232</sup>Th, <sup>238</sup>U and <sup>40</sup>K, and estimates of beta and gamma dose rate, were also obtained from environmental radioactivity measurements using a MiDose Solutions µDose unit (S/N 016: Tudyka et al., 2018; Kolb et al., 2022) (Table S5). These estimates of beta and gamma dose rate were combined using weighted statistics with the infinite matrix dose rates obtained from ICP-MS and ICP-OES.

Water contents were determined for all samples in the laboratory, with values of values of c. 15–25% adopted to determine effective environmental dose rates ( $\dot{D}$ ). The dose rates measurements were used in combination with the assumed burial water contents to determine the total effective dose rates for age estimation (Table S6).

The contributions from the cosmic dose were modelled after (Sanderson and Kinnaird, 2019), by combining latitude and altitude specific dose rates ( $0.19 \pm 0.07 \text{ mGy a}^{-1}$ ), with time-dependent corrections for water depth and overburden as follows, based on the following assumptions:

- TP22-VC03 and TP22-VC07: the sands forming the Stroombank were deposited offshore (bleached during transport) and almost instantaneously flooded. Current depth of water 11.1 m and 12.0 m, respectively.
- TP22-VC26: the sands forming the Stroombank deposited offshore (bleached during transport) and almost instantaneously flooded; the coarse-sands / gravels at the base of the Stroombank were deposited in an offshore to near-shore environment and the underlying sands, in a near-shore to shoreline setting. The sands underneath the Stroombank might have received a contribution from the cosmic dose between deposition and inundation sometime between 500BC and 500AD.

Table S3: ICP-MS and ICP-OES determinations of K (%), U and Th (ppm) concentrations

| Core      | Lab code / CERSA# | Depth in core /cm | K / %           | U / ppm         | Th / ppm        |
|-----------|-------------------|-------------------|-----------------|-----------------|-----------------|
| TP22-VC26 | 1199A             | 105.5-110.5       | $1.18 \pm 0.06$ | $0.58 \pm 0.03$ | $1.71 \pm 0.09$ |
|           | 1199B             | 100.5-115.5       | $0.82 \pm 0.04$ | $0.59 \pm 0.03$ | $1.75 \pm 0.09$ |
|           | 1199C             | 124-129           | $0.76 \pm 0.04$ | $0.54 \pm 0.03$ | $1.50 \pm 0.08$ |
|           | 1199D             | 130-133           | $0.73 \pm 0.04$ | $0.56 \pm 0.03$ | $1.37 \pm 0.07$ |
|           | 1199E             | 140-145           | $0.49 \pm 0.02$ | $0.55 \pm 0.03$ | $1.14 \pm 0.06$ |
|           | 1199F             | 151-155           | $0.45 \pm 0.02$ | $0.56 \pm 0.03$ | $1.11 \pm 0.06$ |
|           | 1199G             | 166-170           | $0.36 \pm 0.02$ | $0.51 \pm 0.03$ | $0.85 \pm 0.04$ |
|           | 1199H             | 177-183           | $0.98 \pm 0.05$ | $0.56 \pm 0.03$ | $1.83 \pm 0.09$ |
|           | 1199I             | 185-190           | $1.07 \pm 0.05$ | $0.62 \pm 0.03$ | $2.16 \pm 0.11$ |
|           | 1199J             | 202-205           | $1.04 \pm 0.05$ | $0.78 \pm 0.04$ | $2.05 \pm 0.10$ |
| TP22-VC07 | 1201A             | 33.5-38.5         | $0.79 \pm 0.04$ | $0.78 \pm 0.04$ | $1.68 \pm 0.08$ |
|           | 1201D             | 189-194           | $0.84 \pm 0.04$ | $0.47 \pm 0.02$ | $1.58 \pm 0.08$ |
|           | 1201E             | 199-204           | $0.79 \pm 0.04$ | $0.47 \pm 0.02$ | $1.38 \pm 0.07$ |
| TP22-VC03 | 1203A             | 155-160           | $0.78 \pm 0.04$ | $0.72 \pm 0.04$ | $2.42 \pm 0.12$ |
|           | 1203B             | 162-166           | $0.65 \pm 0.03$ | $0.49 \pm 0.02$ | $1.44 \pm 0.07$ |
|           | 1203C             | 171-175           | $0.82 \pm 0.04$ | $0.51 \pm 0.03$ | $1.75 \pm 0.09$ |

Table S4: Infinite matrix dose rates determined from ICP-MS and ICP-OES and alpha- and beta-counting

| Core      | Lab code/<br>CERSA# | ICP-MS and ICP-OES                  |                                    |                                     | α and β counts, uDose               |                                    |                                     |
|-----------|---------------------|-------------------------------------|------------------------------------|-------------------------------------|-------------------------------------|------------------------------------|-------------------------------------|
|           |                     | Alpha, dry /<br>mGy a <sup>-1</sup> | Beta, dry /<br>mGy a <sup>-1</sup> | Gamma, dry /<br>mGy a <sup>-1</sup> | Alpha, dry /<br>mGy a <sup>-1</sup> | Beta, dry /<br>mGy a <sup>-1</sup> | Gamma, dry /<br>mGy a <sup>-1</sup> |
| TP22-VC26 | 1199A               | 2.87 ± 0.10                         | 1.02 ± 0.05                        | 0.44 ± 0.02                         | 2.71 ± 0.14                         | 1.01 ± 0.06                        | 0.40 ± 0.02                         |
|           | 1199B               | 2.95 ± 0.11                         | 0.75 ± 0.03                        | 0.36 ± 0.01                         | 2.58 ± 0.12                         | 0.66 ± 0.05                        | 0.30 ± 0.02                         |
|           | 1199C               | 2.63 ± 0.09                         | 0.68 ± 0.03                        | 0.32 ± 0.01                         | 2.49 ± 0.13                         | 0.64 ± 0.05                        | 0.29 ± 0.02                         |
|           | 1199D               | 2.58 ± 0.09                         | 0.66 ± 0.03                        | 0.31 ± 0.01                         | 3.54 ± 0.27                         | 0.85 ± 0.06                        | 0.44 ± 0.03                         |
|           | 1199E               | 2.38 ± 0.09                         | 0.47 ± 0.02                        | 0.24 ± 0.01                         | 2.09 ± 0.10                         | 0.41 ± 0.04                        | 0.18 ± 0.01                         |
|           | 1199F               | 2.37 ± 0.09                         | 0.44 ± 0.02                        | 0.23 ± 0.01                         | 1.76 ± 0.12                         | 0.29 ± 0.04                        | 0.18 ± 0.02                         |
|           | 1199G               | 2.05 ± 0.08                         | 0.36 ± 0.01                        | 0.19 ± 0.01                         | 0.25 ± 0.03                         | 0.23 ± 0.04                        | 0.18 ± 0.02                         |
|           | 1199H               | 2.92 ± 0.10                         | 0.86 ± 0.04                        | 0.39 ± 0.01                         | 0.43 ± 0.05                         | 0.63 ± 0.05                        | 0.35 ± 0.03                         |
|           | 1199I               | 3.32 ± 0.12                         | 0.95 ± 0.04                        | 0.44 ± 0.01                         | 0.31 ± 0.03                         | 0.59 ± 0.05                        | 0.33 ± 0.02                         |
|           | 1199J               | 3.68 ± 0.13                         | 0.94 ± 0.04                        | 0.44 ± 0.01                         | 0.34 ± 0.04                         | 0.62 ± 0.05                        | 0.28 ± 0.02                         |
| VC07      | 1201A               | 3.41 ± 0.12                         | 0.74 ± 0.03                        | 0.36 ± 0.01                         | -                                   | -                                  | -                                   |
|           | 1201C               | -                                   | -                                  | -                                   | 0.20 ± 0.02                         | 0.16 ± 0.04                        | 0.11 ± 0.01                         |
|           | 1201D               | 2.48 ± 0.09                         | 0.74 ± 0.03                        | 0.34 ± 0.01                         | 0.23 ± 0.03                         | 0.19 ± 0.04                        | 0.15 ± 0.02                         |
|           | 1201E               | 2.32 ± 0.08                         | 0.70 ± 0.03                        | 0.31 ± 0.01                         | 0.19 ± 0.02                         | 0.15 ± 0.04                        | 0.13 ± 0.02                         |
| TP22-VC03 | 1203A               | 3.78 ± 0.13                         | 0.75 ± 0.03                        | 0.39 ± 0.01                         | 0.32 ± 0.03                         | 0.54 ± 0.05                        | 0.30 ± 0.03                         |
|           | 1203B               | 2.45 ± 0.09                         | 0.60 ± 0.03                        | 0.29 ± 0.01                         | 0.22 ± 0.04                         | 0.22 ± 0.04                        | 0.20 ± 0.02                         |
|           | 1203C               | 2.71 ± 0.10                         | 0.73 ± 0.03                        | 0.34 ± 0.01                         | 0.24 ± 0.03                         | 0.21 ± 0.04                        | 0.13 ± 0.02                         |

Table S5a: Total environmental dose rates: <sup>a</sup>Effective beta dose rate combining water content corrections with inverse grain size attenuation factors obtained Mejdahl (1979) for K, U, and Th; <sup>b</sup>gamma dose rates reconciled using a distance-weighted contribution; <sup>c</sup>includes a cosmic dose contribution, modelled assuming inudation at AD 500; <sup>d,e,f</sup> derived from <sup>d</sup> ICP-OES, ICP-MS, alpha and beta counting, <sup>e</sup> alpha and beta counting, and <sup>f</sup> ICP-OES and ICP-MS, weighted by error

| Core      | Lab code /<br>CERSA# | Water content /<br>% | Cosmic dose /<br>mGy a <sup>-1</sup> | Effective dose rates, wet / mGy a <sup>-1</sup> |                    |                    |
|-----------|----------------------|----------------------|--------------------------------------|-------------------------------------------------|--------------------|--------------------|
|           |                      |                      |                                      | Beta <sup>a</sup>                               | Gamma <sup>b</sup> | Total <sup>c</sup> |
| TP22-VC26 | 1199A <sup>d</sup>   | 22 ± 7               | 0.06 ± 0.01                          | 0.81 ± 0.05                                     | 0.29 ± 0.04        | 1.16 ± 0.06        |
|           | 1199B <sup>d</sup>   | 20 ± 6               | 0.06 ± 0.01                          | 0.58 ± 0.03                                     | 0.28 ± 0.04        | 0.91 ± 0.05        |
|           | 1199C <sup>d</sup>   | 19 ± 6               | 0.06 ± 0.01                          | 0.55 ± 0.03                                     | 0.25 ± 0.03        | 0.85 ± 0.05        |
|           | 1199D <sup>d</sup>   | 20 ± 6               | 0.06 ± 0.01                          | 0.58 ± 0.03                                     | 0.24 ± 0.03        | 0.88 ± 0.05        |
|           | 1199E <sup>d</sup>   | 19 ± 6               | 0.05 ± 0.01                          | 0.37 ± 0.02                                     | 0.20 ± 0.04        | 0.62 ± 0.04        |
|           | 1199F <sup>d</sup>   | 18 ± 5               | 0.05 ± 0.01                          | 0.33 ± 0.02                                     | 0.18 ± 0.04        | 0.56 ± 0.04        |
|           | 1199G <sup>d</sup>   | 18 ± 5               | 0.05 ± 0.01                          | 0.27 ± 0.02                                     | 0.18 ± 0.04        | 0.51 ± 0.04        |
|           | 1199H <sup>d</sup>   | 21 ± 6               | 0.12 ± 0.02                          | 0.59 ± 0.04                                     | 0.25 ± 0.04        | 0.96 ± 0.06        |
|           | 1199I <sup>d</sup>   | 20 ± 6               | 0.12 ± 0.02                          | 0.59 ± 0.04                                     | 0.28 ± 0.04        | 0.98 ± 0.06        |
|           | 1199J <sup>d</sup>   | 23 ± 7               | 0.11 ± 0.02                          | 0.60 ± 0.04                                     | 0.27 ± 0.05        | 0.99 ± 0.06        |
| TP22-VC07 | 1201A <sup>e</sup>   | 17 ± 5               | 0.06 ± 0.01                          | 0.63 ± 0.04                                     | 0.31 ± 0.06        | 0.93 ± 0.07        |
|           | 1201C <sup>f</sup>   | 18 ± 5               | 0.05 ± 0.01                          | 0.16 ± 0.04                                     | 0.11 ± 0.09        | 0.27 ± 0.10        |
|           | 1201D <sup>d</sup>   | 22 ± 7               | 0.05 ± 0.01                          | 0.35 ± 0.03                                     | 0.20 ± 0.01        | 0.60 ± 0.03        |
|           | 1201E <sup>d</sup>   | 22 ± 7               | 0.05 ± 0.01                          | 0.33 ± 0.03                                     | 0.19 ± 0.01        | 0.56 ± 0.03        |
| TP22-VC03 | 1203A <sup>d</sup>   | 20 ± 6               | 0.05 ± 0.01                          | 0.58 ± 0.03                                     | 0.26 ± 0.04        | 0.89 ± 0.05        |
|           | 1203B <sup>d</sup>   | 19 ± 6               | 0.05 ± 0.01                          | 0.36 ± 0.03                                     | 0.24 ± 0.04        | 0.64 ± 0.05        |
|           | 1203C <sup>d</sup>   | 22 ± 7               | 0.05 ± 0.01                          | 0.37 ± 0.03                                     | 0.21 ± 0.05        | 0.62 ± 0.05        |

Table S5b: Total environmental dose rates. <sup>a</sup>Effective beta dose rate combining water content corrections with inverse grain size attenuation factors obtained Mejdahl (1979) for K, U, and Th; <sup>b</sup>gamma dose rates reconciled using a distance-weighted contribution; <sup>c</sup>includes a cosmic dose contribution, modelled assuming inundation at 500 BC; <sup>d</sup> derived from ICP-OES, ICP-MS, alpha and beta counting

| Lab code / CERSA#  | Water content / % | Cosmic dose / mGy a <sup>-1</sup> | Effective dose rates, wet / mGy a <sup>-1</sup> |                    |                    |
|--------------------|-------------------|-----------------------------------|-------------------------------------------------|--------------------|--------------------|
|                    |                   |                                   | Beta <sup>a</sup>                               | Gamma <sup>b</sup> | Total <sup>c</sup> |
| 1199H <sup>d</sup> | 21 ± 6            | 0.10 ± 0.02                       | 0.59 ± 0.04                                     | 0.25 ± 0.04        | 0.95 ± 0.06        |
| 1199I <sup>d</sup> | 20 ± 6            | 0.10 ± 0.02                       | 0.59 ± 0.04                                     | 0.28 ± 0.04        | 0.97 ± 0.06        |
| 1199J <sup>d</sup> | 23 ± 7            | 0.10 ± 0.02                       | 0.60 ± 0.04                                     | 0.27 ± 0.05        | 0.97 ± 0.06        |

**Age Assimilation.** Table S6 lists the burial doses, the total effective dose rates and the corresponding depositional ages for TP22-VC03, TP22-VC07 and TP22-VC26.

TP22-VC26 (CERSA1998/1999): the consistency between the stage 1 and stage 2 datasets, and the spatial associations between the dating positions down core, mean that several weighted combinations can be considered:

- for the lower part of the sequence, the weighted combination of CERSA1199H, 1199I and 1199J, assuming inundation by 500 CE, is  $5.03 \pm 0.24$  (3010 ± 240 BCE); or assuming earlier inundation around 500 CE,  $5.13 \pm 0.25$  (3110 ± 250 BCE)
- the gravels were deposited at  $\sim 1.05 \pm 0.10$  ka (980 ± 100 CE)
- and the sand body no later than  $0.89 \pm 0.05$  ka (1130 ± 50 CE)

TP22-VC07 (CERSA1200/1201): the Stroombank – as recovered in core TP22-VC07 – is dated to  $780 \pm 120$  CE (CERSA1200/20) to  $720 \pm 170$  CE (CERSA1200/22), or  $760 \pm 100$  CE, the weighted combination of the two.

TP22-VC03 (CERSA1202/1203): the sands beneath the erosional surface are characterised by the broad equivalent dose distributions, reflecting mixing of a well-bleached component and sediment carrying luminescence residuals. The dates for these sands are poorly resolved, suggesting deposition in the late first millennium,  $930 \pm 290$  CE and  $930 \pm 540$  CE (CERSA1202/15 and CERSA1202/16, respectively). The weighted combination of these two depositional ages is  $940 \pm 250$  CE.

Table S6: Burial doses, total effective environmental dose rates and corresponding depositional ages for VC02, VC07 and TP22-VC26 (CERSA1202, 1200 and 1198); <sup>4a</sup> assuming inundation by 500 CE, <sup>4b</sup> by 500 BC.

| Core      | Depth (cm)  | CERSA # | Burial dose /Gy | Total effective dose rate / mGy a <sup>-1</sup>        | Age / ka                                               | Calendar years                                               |
|-----------|-------------|---------|-----------------|--------------------------------------------------------|--------------------------------------------------------|--------------------------------------------------------------|
| TP22-VC26 | 105.5-110.5 | 1199A   | 0.97 ± 0.19     | 1.16 ± 0.06                                            | 0.83 ± 0.17                                            | 1190 ± 170 CE                                                |
|           | 110.5-115.5 | 1199B   | 0.90 ± 0.11     | 0.91 ± 0.05                                            | 0.98 ± 0.13                                            | 1040 ± 130 CE                                                |
|           | 124-129     | 1199C   | 0.74 ± 0.07     | 0.85 ± 0.05                                            | 0.87 ± 0.10                                            | 1150 ± 100 CE                                                |
|           | 130-133     | 1199D   | 0.78 ± 0.04     | 0.88 ± 0.05                                            | 0.89 ± 0.06                                            | 1130 ± 60 CE                                                 |
|           | 140-145     | 1199E   | 0.62 ± 0.11     | 0.62 ± 0.04                                            | 1.00 ± 0.19                                            | 1020 ± 190 CE                                                |
|           | 151-155     | 1199F   | 0.60 ± 0.05     | 0.56 ± 0.04                                            | 1.07 ± 0.12                                            | 950 ± 120 CE                                                 |
|           | 166-170     | 1199G   | 1.90 ± 0.56     | 0.51 ± 0.04                                            | 3.75 ± 1.16                                            | 1730 ± 1160 BCE                                              |
|           | 177-183     | 1199H   | 4.92 ± 0.21     | 0.96 ± 0.06 <sup>4a</sup><br>0.95 ± 0.06 <sup>4b</sup> | 5.11 ± 0.37 <sup>4a</sup><br>5.21 ± 0.38 <sup>4b</sup> | 3090 ± 370 BCE <sup>4a</sup><br>3190 ± 380 BCE <sup>4a</sup> |
|           | 185-190     | 1199I   | 4.54 ± 0.59     | 0.98 ± 0.06 <sup>4a</sup><br>0.97 ± 0.06 <sup>4b</sup> | 4.61 ± 0.65 <sup>4a</sup><br>4.70 ± 0.67 <sup>4b</sup> | 2590 ± 650 BCE <sup>4a</sup><br>2680 ± 670 BCE <sup>4b</sup> |
|           | 202-205     | 1199J   | 5.03 ± 0.14     | 0.99 ± 0.06 <sup>4a</sup><br>0.97 ± 0.06 <sup>4b</sup> | 5.09 ± 0.36 <sup>4a</sup><br>5.19 ± 0.37 <sup>4b</sup> | 3070 ± 360 BCE <sup>4a</sup><br>3170 ± 370 BCE <sup>4b</sup> |

|           |     |         |                  |                 |                  |                                 |
|-----------|-----|---------|------------------|-----------------|------------------|---------------------------------|
| TP22-VC07 | 184 | 1200-20 | $0.78 \pm 0.05$  | $0.63 \pm 0.05$ | $1.24 \pm 0.12$  | $780 \pm 120$ CE                |
|           | 204 | 1200-22 | $0.72 \pm 0.08$  | $0.56 \pm 0.04$ | $1.30 \pm 0.17$  | $720 \pm 170$ CE                |
| TP22-VC03 | 141 | 1202-15 | $0.97 \pm 0.21$  | $0.89 \pm 0.14$ | $1.09 \pm 0.29$  | $930 \pm 290$ CE                |
|           | 148 | 1202-16 | $0.96 \pm 0.46$  | $0.89 \pm 0.14$ | $1.08 \pm 0.54$  | $940 \pm 540$ CE                |
|           | 154 | 1202-17 | $1.36 \pm 0.97$  | $0.89 \pm 0.05$ | $1.54 \pm 1.10$  | ~ 1 <sup>st</sup> millennium CE |
|           | 170 | 1202-19 | $51.54 \pm 2.92$ | $0.62 \pm 0.05$ | $83.13 \pm 8.20$ |                                 |

## References

- Bell, W.T., 1979. Attenuation factors for the absorbed radiation dose in quartz inclusions for thermoluminescence dating. *Anc. TL* 8, 1–12. <https://doi.org/10.26034/la.atl.1979.022>
- Duller, G.A.T., 2003. Distinguishing quartz and feldspar in single grain luminescence measurements. *Radiat. Meas.* 37, 161–165. [https://doi.org/10.1016/S1350-4487\(02\)00170-1](https://doi.org/10.1016/S1350-4487(02)00170-1)
- Guérin, G., Mercier, N., Adamiec, G., 2011. Dose-rate conversion factors: update. *Anc. TL* 29, 5–8. <https://doi.org/10.26034/la.atl.2011.443>
- Guérin, G., Mercier, N., Nathan, R., Adamiec, G., Lefrais, Y., 2012. On the use of the infinite matrix assumption and associated concepts: a critical review. *Radiat. Meas.* 47, 778–785. <https://doi.org/10.1016/j.radmeas.2012.04.004>
- Kinnaird, T., Bolòs, J., Turner, A., Turner, S., 2017. Optically-stimulated luminescence profiling and dating of historic agricultural terraces in Catalonia (Spain). *J. Archaeol. Sci.* 78, 66–77. <https://doi.org/10.1016/j.jas.2016.11.003>
- Kolb, T., Tudyka, K., Kadereit, A., Lomax, J., Poręba, G., Zander, A., Zipf, L., Fuchs, M., 2022. The  $\mu$ Dose system: determination of environmental dose rates by combined alpha and beta counting – performance tests and practical experiences. *Geochronology* 4, 1–31. <https://doi.org/10.5194/gchron-4-1-2022>
- Lichtenberger, A., Raja, R., Seland, E.H., Kinnaird, T., Simpson, I.A., 2019. Urban-riverine hinterland synergies in semi-arid environments: millennial-scale change, adaptations, and environmental responses at Gerasa/Jerash. *J. Field Archaeol.* 44, 333–351. <https://doi.org/10.1080/00934690.2019.1625619>
- Mejdahl, V., 1979. Thermoluminescence dating: beta-dose attenuation in quartz grains. *Archaeometry* 21, 61–72. <https://doi.org/10.1111/j.1475-4754.1979.tb00241.x>
- Munyikwa, K., Kinnaird, T.C., Sanderson, D.C.W., 2021. The potential of portable luminescence readers in geomorphological investigations: a review. *Earth Surf. Process. Landf.* 46, 131–150. <https://doi.org/10.1002/esp.4975>
- Murray, A.S., Wintle, A.G., 2003. The single aliquot regenerative dose protocol: potential for improvements in reliability. *Radiat. Meas.* 37, 377–381. [https://doi.org/10.1016/S1350-4487\(03\)00053-2](https://doi.org/10.1016/S1350-4487(03)00053-2)

- Sanderson, D.C.W., Kinnaird, T.C., 2019. Optically stimulated luminescence dating as a geochronological tool for late Quaternary sediments in the Red Sea region, in: Rasul, N.M.A., Stewart, I.C.F. (Eds.), *Geological Setting, Palaeoenvironment and Archaeology of the Red Sea*. Springer International Publishing, Cham, pp. 685–707. [https://doi.org/10.1007/978-3-319-99408-6\\_31](https://doi.org/10.1007/978-3-319-99408-6_31)
- Tudyka, K., Miłosz, S., Adamiec, G., Bluszcz, A., Poręba, G., Paszkowski, Ł., Kolarczyk, A., 2018.  $\mu$ Dose: a compact system for environmental radioactivity and dose rate measurement. *Radiat. Meas.* 118, 8–13. <https://doi.org/10.1016/j.radmeas.2018.07.016>
- Turner, S., Kinnaird, T., Varinlioğlu, G., Şerifoğlu, T.E., Koparal, E., Demirciler, V., Athanasoulis, D., Ødegård, K., Crow, J., Jackson, M., Bolòs, J., Sánchez-Pardo, J.C., Carrer, F., Sanderson, D., Turner, A., 2021. Agricultural terraces in the Mediterranean: medieval intensification revealed by OSL profiling and dating. *Antiquity* 95, 773–790. <https://doi.org/10.15184/aqy.2020.187>
- Vervust, S., Kinnaird, T., Herring, P., Turner, S., 2020. Optically stimulated luminescence profiling and dating of earthworks: the creation and development of prehistoric field boundaries at Bosigran, Cornwall. *Antiquity* 94, 420–436. <https://doi.org/10.15184/aqy.2019.138>

**Report. Optically stimulated luminescence profiling and dating of cores TP22-VC04, TP22-VC05, TP22-VC06-1, TP22-VC24, TP22-VC25, TP22-VC38 and TP23-VC43**

Tim Kinnaird, Aayush Srivastava

*School of Earth and Environmental Sciences, University of St Andrews*

Soetkin Vervust

*Archaeology, Environmental Changes, and Geo-Chemistry (AMGC), Vrije Universiteit Brussel*

Víctor Cartelle, Ruth Plets

*Flanders Marine Institute (VLIZ)*

**Introduction**

This supplementary data file concerns the optically stimulated luminescence investigations of cores TP22-VC04, TP22-VC05, TP22-VC06-1, TP22-VC24, TP22-VC25, TP22-VC38 and TP23-VC43, together with new profiling of core TP22-VC26.

**Sampling and OSL screening**

Sampling was undertaken by Soetkin Vervust and Víctor Cartelle between the 2<sup>nd</sup> and 3<sup>rd</sup> of May 2024. Table S7 lists the IRSL and OSL net signal intensities, IRSL and OSL depletion indices and IRSL:OSL ratios observed through TP22-VC04, TP22-VC05, TP22-VC06-1, TP22-VC24, TP22-VC25, TP22-VC26, TP23-VC43 and TP22-VC38. It is important to note that these measurements were made on the VUB portable OSL instrument, and that the photomultiplier in this unit has different characteristics and sensitivity to the photomultiplier in the St. Andrews instrument, as used for TP22-VC03, TP22-VC07 and TP22-VC26: signal-depth progressions and breaks should be comparable, the magnitude in signal intensities will not. Therefore, new profiling was performed for core TP22-VC26.

*Table S7: IRSL and OSL signal intensities and IRSL and OSL depletion indices for TP22-VC04, TP22-VC05, TP22-VC06-1, TP22-VC24, TP22-VC25, TP22-VC26, TP22-VC43 and TP22-VC38.*

| Core        | Depth / cm | IRSL signal intensities / counts | IRSL depletion | OSL signal intensities / counts | OSL depletion |
|-------------|------------|----------------------------------|----------------|---------------------------------|---------------|
| TP22-VC04   | 20         | 2630 ± 60                        | 1.36 ± 0.06    | 18080 ± 140                     | 1.6 ± 0.02    |
|             | 45         | 4140 ± 70                        | 1.42 ± 0.05    | 27800 ± 170                     | 1.73 ± 0.02   |
|             | 60         | 6790 ± 90                        | 1.39 ± 0.04    | 39030 ± 200                     | 1.74 ± 0.02   |
|             | 80         | 4670 ± 80                        | 1.4 ± 0.04     | 37930 ± 200                     | 1.85 ± 0.02   |
|             | 100        | 3760 ± 70                        | 1.36 ± 0.05    | 24960 ± 160                     | 1.66 ± 0.02   |
|             | 120        | 3890 ± 70                        | 1.39 ± 0.05    | 27350 ± 170                     | 1.79 ± 0.02   |
|             | 145        | 3520 ± 70                        | 1.39 ± 0.05    | 25040 ± 160                     | 1.74 ± 0.02   |
|             | 160        | 3650 ± 70                        | 1.38 ± 0.05    | 21250 ± 150                     | 1.72 ± 0.02   |
|             | 180        | 4040 ± 70                        | 1.4 ± 0.05     | 27030 ± 170                     | 1.79 ± 0.02   |
|             | 194        | 2470 ± 60                        | 1.27 ± 0.06    | 19050 ± 140                     | 1.55 ± 0.02   |
|             | 207        | 4280 ± 70                        | 1.41 ± 0.05    | 26070 ± 170                     | 1.66 ± 0.02   |
|             | 220        | 2540 ± 60                        | 1.31 ± 0.06    | 16970 ± 130                     | 1.69 ± 0.03   |
| 227         | 4810 ± 80  | 1.33 ± 0.04                      | 30910 ± 180    | 1.64 ± 0.02                     |               |
| TP22-VC05   | 40         | 2590 ± 60                        | 1.16 ± 0.05    | 26870 ± 170                     | 1.25 ± 0.02   |
|             | 80         | 28340 ± 170                      | 1.31 ± 0.02    | 165210 ± 410                    | 1.81 ± 0.01   |
|             | 120        | 20450 ± 150                      | 1.27 ± 0.02    | 116870 ± 340                    | 1.77 ± 0.01   |
|             | 160        | 22610 ± 150                      | 1.31 ± 0.02    | 125540 ± 360                    | 1.8 ± 0.01    |
| TP22-VC06-1 | 30         | 6630 ± 90                        | 1.33 ± 0.03    | 50610 ± 230                     | 1.57 ± 0.01   |
|             | 50         | 44590 ± 210                      | 1.31 ± 0.01    | 271130 ± 520                    | 1.88 ± 0.01   |
|             | 80         | 45850 ± 220                      | 1.36 ± 0.01    | 250500 ± 500                    | 1.82 ± 0.01   |

|           |     |                |             |                 |             |
|-----------|-----|----------------|-------------|-----------------|-------------|
|           | 110 | 32890 ± 180    | 1.34 ± 0.02 | 191390 ± 440    | 1.86 ± 0.01 |
|           | 140 | 24910 ± 160    | 1.34 ± 0.02 | 185200 ± 430    | 1.81 ± 0.01 |
|           | 155 | 438480 ± 670   | 1.29 ± 0    | 3577470 ± 1900  | 1.89 ± 0    |
|           | 168 | 3124960 ± 1770 | 1.31 ± 0    | 16344390 ± 4050 | 1.81 ± 0    |
|           | 180 | 3931940 ± 1990 | 1.27 ± 0    | 21282090 ± 4630 | 1.76 ± 0    |
| TP22-VC24 | 30  | 530 ± 40       | 1.12 ± 0.11 | 12710 ± 120     | 1.18 ± 0.02 |
|           | 60  | 1450 ± 50      | 1.22 ± 0.07 | 14020 ± 120     | 1.34 ± 0.02 |
|           | 90  | 12890 ± 120    | 1.33 ± 0.02 | 112120 ± 340    | 1.97 ± 0.01 |
|           | 110 | 6720 ± 90      | 1.26 ± 0.03 | 93600 ± 310     | 1.85 ± 0.01 |
|           | 130 | 17240 ± 140    | 1.29 ± 0.02 | 118600 ± 350    | 1.77 ± 0.01 |
|           | 150 | 47280 ± 220    | 1.29 ± 0.01 | 393500 ± 630    | 1.95 ± 0.01 |
|           | 170 | 49110 ± 220    | 1.27 ± 0.01 | 368300 ± 610    | 1.81 ± 0.01 |
|           | 190 | 16080 ± 130    | 1.31 ± 0.02 | 103910 ± 330    | 1.82 ± 0.01 |
|           | 200 | 17470 ± 140    | 1.27 ± 0.02 | 133110 ± 370    | 1.83 ± 0.01 |
|           | 206 | 41790 ± 210    | 1.32 ± 0.01 | 311440 ± 560    | 1.9 ± 0.01  |
| TP22-VC25 | 30  | 920 ± 40       | 1.45 ± 0.1  | 11360 ± 110     | 1.35 ± 0.03 |
|           | 60  | 11220 ± 110    | 1.29 ± 0.02 | 70570 ± 270     | 1.81 ± 0.01 |
|           | 90  | 7800 ± 90      | 1.27 ± 0.03 | 41950 ± 210     | 1.65 ± 0.02 |
|           | 140 | 9970 ± 100     | 1.28 ± 0.03 | 60220 ± 250     | 1.74 ± 0.01 |
|           | 170 | 12440 ± 120    | 1.29 ± 0.02 | 68850 ± 260     | 1.75 ± 0.01 |
|           | 200 | 9220 ± 100     | 1.34 ± 0.03 | 53360 ± 230     | 1.74 ± 0.02 |
| TP22-VC26 | 31  | 13810 ± 120    | 1.33 ± 0.02 | 81670 ± 290     | 1.76 ± 0.01 |
|           | 47  | 30340 ± 180    | 1.37 ± 0.02 | 176220 ± 420    | 1.82 ± 0.01 |
|           | 75  | 23170 ± 160    | 1.36 ± 0.02 | 130980 ± 360    | 1.86 ± 0.01 |
|           | 96  | 22400 ± 150    | 1.33 ± 0.02 | 138730 ± 380    | 1.73 ± 0.01 |
|           | 113 | 26970 ± 170    | 1.38 ± 0.02 | 172020 ± 420    | 1.82 ± 0.01 |
|           | 125 | 48440 ± 220    | 1.39 ± 0.01 | 316200 ± 570    | 1.67 ± 0.01 |
|           | 131 | 24890 ± 160    | 1.31 ± 0.02 | 221250 ± 470    | 1.61 ± 0.01 |
|           | 141 | 24040 ± 160    | 1.25 ± 0.02 | 283030 ± 540    | 1.31 ± 0    |
|           | 168 | 35170 ± 190    | 1.21 ± 0.01 | 378050 ± 620    | 1.42 ± 0    |
|           | 186 | 205270 ± 460   | 1.35 ± 0.01 | 1144170 ± 1070  | 1.97 ± 0    |
| TP23-VC43 | 30  | 1040 ± 50      | 1.47 ± 0.1  | 5590 ± 80       | 1.56 ± 0.04 |
|           | 90  | 1770 ± 50      | 1.2 ± 0.06  | 12680 ± 120     | 1.62 ± 0.03 |
|           | 120 | 1970 ± 50      | 1.17 ± 0.06 | 13690 ± 120     | 1.49 ± 0.03 |
|           | 133 | 4100 ± 70      | 1.24 ± 0.04 | 34220 ± 190     | 1.67 ± 0.02 |
|           | 150 | 3390 ± 70      | 1.33 ± 0.05 | 24180 ± 160     | 1.7 ± 0.02  |
|           | 166 | 101910 ± 320   | 1.25 ± 0.01 | 840950 ± 920    | 1.76 ± 0    |
|           | 170 | 166520 ± 410   | 1.27 ± 0.01 | 1776840 ± 1340  | 2.03 ± 0    |
|           | 180 | 3362270 ± 1840 | 1.35 ± 0    | 18257130 ± 4280 | 1.98 ± 0    |
|           | 190 | 2486200 ± 1580 | 1.27 ± 0    | 17797870 ± 4230 | 1.85 ± 0    |
|           | 210 | 2419710 ± 1560 | 1.25 ± 0    | 20203740 ± 4510 | 1.93 ± 0    |
|           | 240 | 2021640 ± 1430 | 1.27 ± 0    | 14824510 ± 3860 | 1.84 ± 0    |
| TP22-VC38 | 30  | 3270 ± 70      | 1.22 ± 0.05 | 24360 ± 160     | 1.1 ± 0.01  |
|           | 60  | 3090 ± 60      | 1.37 ± 0.05 | 27050 ± 170     | 1.47 ± 0.02 |
|           | 110 | 5050 ± 80      | 1.34 ± 0.04 | 42630 ± 210     | 1.46 ± 0.01 |
|           | 140 | 7330 ± 90      | 1.33 ± 0.03 | 62390 ± 250     | 1.4 ± 0.01  |
|           | 170 | 2880 ± 60      | 1.33 ± 0.05 | 32060 ± 180     | 1.45 ± 0.02 |

Table S8: Details of dated samples.

| Core | CERSA# | Sub-sample | Depth / cm | Associated samples    |
|------|--------|------------|------------|-----------------------|
| VC04 | 1574   | -          | 152        | VC04-145 and VC04-160 |
| VC05 | 1575   | -          | 150        | VC05-120 and VC05-160 |
| VC06 | 1576   | -          | 125        | VC06-110 and VC06-140 |
| VC06 | 1577   | -          | 172        | VC06-168 and VC06-180 |
| VC24 | 1578   | -          | 100        | VC24-90 and VC24-110  |
| VC24 | 1579   | -          | 158        | VC24-150 and VC24-170 |
| VC25 | 1580   | -          | 185        | VC25-170 and VC25-200 |

### Quartz SAR OSL dating

A luminescence age is the quotient of the burial dose (in Gy) over the effective environmental dose rate (in mGy a<sup>-1</sup>). It requires that the sediment was fully bleached prior to burial. Equivalent dose (De) determinations were made on sets of 24 aliquots using the single aliquot regenerative dose (SAR) OSL protocol. Different permutations of the assimilation of equivalent doses to obtain the burial dose were considered, including weighted combinations and statistical dose models (see Guérin et al., 2017). Dose rates to these sediments were assessed using a combination of low-level environmental radioactivity measurements in the laboratory, and determinations of radionuclide concentrations by mass spectrometry.

*Radionuclide concentrations and Environmental dose rates.* Radionuclide concentrations of <sup>232</sup>Th, <sup>238</sup>U and <sup>40</sup>K were determined from inductively coupled plasma mass spectrometry (ICP-MS; U, Th) and inductively coupled plasma optical emission spectrometry (ICP-OES; K) at X-Ray Mineral Services, Welshpool (formerly Chemostrat) (Table S9). Infinite matrix dose rates were calculated from these using the conversion factors of Guérin et al. (2011) and adjusted for attenuation by grain size and chemical etching using the datasets of Guérin et al. (2012) and Bell (1979) respectively (Table S10). Low-level environmental radioactivity measurements were also undertaken using a MiDose Solutions  $\mu$ Dose unit (S/N 016: Tudyka et al., 2018; Kolb et al., 2022).  $\alpha$  and  $\beta$  counts, together with the pulse pairs arising from the subsequent decay chains of <sup>214</sup>Bi/<sup>214</sup>Po, <sup>220</sup>Rn/<sup>216</sup>Po, <sup>212</sup>Bi/<sup>212</sup>Pi and <sup>219</sup>Rn/<sup>215</sup>Po, are used to calculate <sup>238</sup>U, <sup>235</sup>U, <sup>232</sup>Th and <sup>40</sup>K specific activities. Three reference standards produced by the International Atomic Energy Agency (IAEA) – IAEA-RGU-1, IAEA-RGTh-1 and IAEA-RGK-1, were used to calibrate the  $\mu$ Dose using the methodology of Tudyka et al. (2018). Sample measurements were interleaved with background measurements and measurements of the MiDose Solutions reference material, which is comprised of equal quantities of the 3 reference standards. Sub-samples were presented for measurement in the same geometry as the calibration standards. Count times varied from ~ 170 to 250 ks. These estimates of beta and gamma dose rate were combined using weighted statistics with the infinite matrix dose rates obtained from ICP-MS and ICP-OES.

Water contents as received were measured for all samples in the laboratory: fractional water contents were in the range 10.6 to 25.1 % (mean, 18.8%) and saturated water contents, 18.0 to 24.7 % (mean, 20.8 %). Working values of 9.6-25.1% were adopted to determine effective environmental dose rates ( $\dot{D}$ ). The dry infinite matrix dose rates measurements were used in combination with the assumed burial water contents to determine the total effective dose rates for age estimation (Table S11). The contribution from the cosmic dose ( $\dot{D}_{\text{cosmic}}$ ) was determined following Prescott and Hutton (1994), which includes corrections for longitude, latitude and altitude, and the thickness of overburden.

U concentrations ranged between 0.5 and 74 ppm, with a mean of  $5.8 \pm 0.1$  ppm (here and elsewhere, error expressed as standard deviation). Th concentrations ranged between 1.4 and 2.5

ppm, with a mean of  $1.8 \pm 0.4$  ppm. K concentrations between 0.6 and 0.9, with a mean of  $0.8 \pm 0.1$  %. These concentrations are comparable to those observed for VC03, VC07 and VC26: U, 0.5 to 0.8 ppm; Th, 0.9 to 2.7 ppm; and K, 0.4 to 1.2 %.

Dry infinite matrix beta dose rates ranged from 0.6 to 0.8  $\text{mGy a}^{-1}$ , with a mean value of  $0.70 \pm 0.07$   $\text{mGy a}^{-1}$ , and gamma dose rates between 0.3 and 0.4  $\text{mGy a}^{-1}$ , with a mean of  $0.34 \pm 0.03$   $\text{mGy a}^{-1}$ . These estimates are similar to those derived from K, U and Th for VC03, VC07 and VC26: beta dose rates of between 0.4 to 1.0  $\text{mGy a}^{-1}$ , with a comparable mean  $0.7 \pm 0.2$   $\text{mGy a}^{-1}$ ; gamma dose rates of 0.2 to 0.4  $\text{mGy a}^{-1}$ , with a mean of  $0.4 \pm 0.1$   $\text{mGy a}^{-1}$ .

Table S9: ICP-MS and ICP-OES determinations of K (%), U and Th (ppm) concentrations

| Core | CERSA# | Depth in core /cm | K / %           | U / ppm         | Th / ppm        |
|------|--------|-------------------|-----------------|-----------------|-----------------|
| VC04 | 1574   | 152               | $0.63 \pm 0.03$ | $0.46 \pm 0.02$ | $1.46 \pm 0.07$ |
| VC05 | 1575   | 150               | $0.85 \pm 0.04$ | $0.48 \pm 0.02$ | $1.69 \pm 0.08$ |
| VC06 | 1576   | 125               | $0.79 \pm 0.04$ | $0.60 \pm 0.03$ | $1.72 \pm 0.09$ |
| VC06 | 1577   | 170               | $0.74 \pm 0.04$ | $0.72 \pm 0.04$ | $1.68 \pm 0.08$ |
| VC24 | 1578   | 100               | -               | -               | -               |
| VC24 | 1579   | 158               | $0.73 \pm 0.04$ | $0.74 \pm 0.04$ | $2.49 \pm 0.12$ |
| VC25 | 1580   | 185               | $0.85 \pm 0.04$ | $0.46 \pm 0.02$ | $1.52 \pm 0.08$ |

Table S10: Infinite matrix dose rates determined from ICP-MS and ICP-OES

| Core | CERSA# | Depth in core /cm | ICP-OES and ICP-MS               |                                 |                                  | $\mu\text{DOSE}$                |                                  |
|------|--------|-------------------|----------------------------------|---------------------------------|----------------------------------|---------------------------------|----------------------------------|
|      |        |                   | Alpha, dry / $\text{mGy a}^{-1}$ | Beta, dry / $\text{mGy a}^{-1}$ | Gamma, dry / $\text{mGy a}^{-1}$ | Beta, dry / $\text{mGy a}^{-1}$ | Gamma, dry / $\text{mGy a}^{-1}$ |
| VC04 | 1574   | 152               | $2.37 \pm 0.08$                  | $0.57 \pm 0.03$                 | $0.28 \pm 0.01$                  | $0.47 \pm 0.05$                 | $0.21 \pm 0.02$                  |
| VC05 | 1575   | 150               | $2.60 \pm 0.09$                  | $0.75 \pm 0.03$                 | $0.35 \pm 0.01$                  | $0.68 \pm 0.05$                 | $0.30 \pm 0.02$                  |
| VC06 | 1576   | 125               | $2.95 \pm 0.11$                  | $0.72 \pm 0.03$                 | $0.35 \pm 0.01$                  | $0.61 \pm 0.05$                 | $0.31 \pm 0.02$                  |
| VC06 | 1577   | 170               | $3.26 \pm 0.12$                  | $0.70 \pm 0.03$                 | $0.35 \pm 0.01$                  | $0.57 \pm 0.05$                 | $0.29 \pm 0.02$                  |
| VC24 | 1578   | 100               | -                                | -                               | -                                | -                               | -                                |
| VC24 | 1579   | 158               | $3.9 \pm 0.14$                   | $0.71 \pm 0.03$                 | $0.38 \pm 0.01$                  | $0.60 \pm 0.05$                 | $0.35 \pm 0.02$                  |
| VC25 | 1580   | 185               | $2.42 \pm 0.09$                  | $0.75 \pm 0.03$                 | $0.34 \pm 0.01$                  | $0.71 \pm 0.05$                 | $0.28 \pm 0.02$                  |

Table S11: Total environmental dose rates: <sup>a</sup>Effective beta dose rate combining water content corrections with inverse grain size attenuation factors obtained Mejdahl (1979) for K, U, and Th; <sup>b</sup> gamma dose rates reconciled using a distance-weighted contribution; <sup>c</sup> includes a cosmic dose contribution

| Core | CERSA# | Depth in core /cm | Water content | Cosmic dose $\dot{D}_{\text{cosmic}} / \text{mGy a}^{-1}$ | Beta $\dot{D}_{\beta} / \text{mGy a}^{-1}$ | Gamma $\dot{D}_{\gamma} / \text{mGy a}^{-1}$ | Total dose $\dot{D}_{\text{eff}} / \text{mGy a}^{-1}$ |
|------|--------|-------------------|---------------|-----------------------------------------------------------|--------------------------------------------|----------------------------------------------|-------------------------------------------------------|
| VC04 | 1574   | 152               | $16 \pm 5$    | $0.15 \pm 0.02$                                           | $0.46 \pm 0.03$                            | $0.22 \pm 0.01$                              | $0.82 \pm 0.03$                                       |
| VC05 | 1575   | 150               | $20 \pm 6$    | $0.15 \pm 0.01$                                           | $0.59 \pm 0.03$                            | $0.26 \pm 0.01$                              | $1.00 \pm 0.04$                                       |
| VC06 | 1576   | 125               | $25 \pm 8$    | $0.15 \pm 0.02$                                           | $0.52 \pm 0.03$                            | $0.26 \pm 0.04$                              | $0.93 \pm 0.06$                                       |
| VC06 | 1577   | 170               | $21 \pm 6$    | $0.14 \pm 0.01$                                           | $0.52 \pm 0.03$                            | $0.26 \pm 0.04$                              | $0.92 \pm 0.06$                                       |
| VC24 | 1578   | 100               | $18 \pm 5$    | $0.16 \pm 0.02$                                           | $0.55 \pm 0.03$                            | $0.31 \pm 0.01$                              | $1.00 \pm 0.04$                                       |
| VC24 | 1579   | 158               | $18 \pm 5$    | $0.15 \pm 0.01$                                           | $0.55 \pm 0.03$                            | $0.31 \pm 0.01$                              | $1.01 \pm 0.04$                                       |
| VC25 | 1580   | 185               | $21 \pm 6$    | $0.14 \pm 0.01$                                           | $0.59 \pm 0.03$                            | $0.25 \pm 0.01$                              | $0.98 \pm 0.04$                                       |

*Equivalent dose determinations and distribution analysis.* The equivalent dose distributions are shown in figures S4 and S5: figure S4 shows the luminescence stratigraphies for TP22-VC06-1 and TP22-VC05, western and central transects, whereas figure S5 shows the luminescence stratigraphies for TP22-VC24, TP22-VC25 and TP22-VC04, eastern transect. For age assimilation below, the **weighted mean** and standard deviation of the distribution were used in determining depositional ages.

*Age assimilations.* Table S12 lists the burial doses, environmental dose rates and corresponding depositional ages for CERSA1574-1580.

Table S12: Burial doses, total effective environmental dose rates and corresponding depositional ages.

| <i>Core</i> | <i>CERSA#</i> | <i>Depth / cm</i> | <i>Palaeodose / Gy</i> | <i>Aliquots, n</i> | <i>Dose rate / mGy a<sup>-1</sup></i> | <i>Age / ka</i> | <i>Calendar years</i> |
|-------------|---------------|-------------------|------------------------|--------------------|---------------------------------------|-----------------|-----------------------|
| VC04        | 1574          | 152               | 0.17 ± 0.03            | 17 (24)            | 0.82 ± 0.03                           | 0.20 ± 0.03     | 1820 ± 30 CE          |
| VC05        | 1575          | 150               | 0.72 ± 0.05            | 19 (24)            | 1.00 ± 0.04                           | 0.72 ± 0.06     | 1300 ± 60 CE          |
| VC06        | 1576          | 125               | 1.12 ± 0.04            | 17 (24)            | 0.93 ± 0.06                           | 1.20 ± 0.09     | 820 ± 90 CE           |
| VC06        | 1577          | 170               | 91.0 ± 31.5            | 22 (24)            | 0.92 ± 0.06                           | 98.6 ± 34.7     |                       |
| VC24        | 1578          | 100               | 0.43 ± 0.13            | 17 (24)            | 1.00 ± 0.04                           | 0.43 ± 0.13     | 1600 ± 130 CE         |
| VC24        | 1579          | 158               | 1.33 ± 0.06            | 19 (24)            | 1.01 ± 0.04                           | 1.32 ± 0.08     | 700 ± 80 CE           |
| VC25        | 1580          | 185               | 0.43 ± 0.03            | 22 (24)            | 0.98 ± 0.04                           | 0.44 ± 0.03     | 1580 ± 30 CE          |

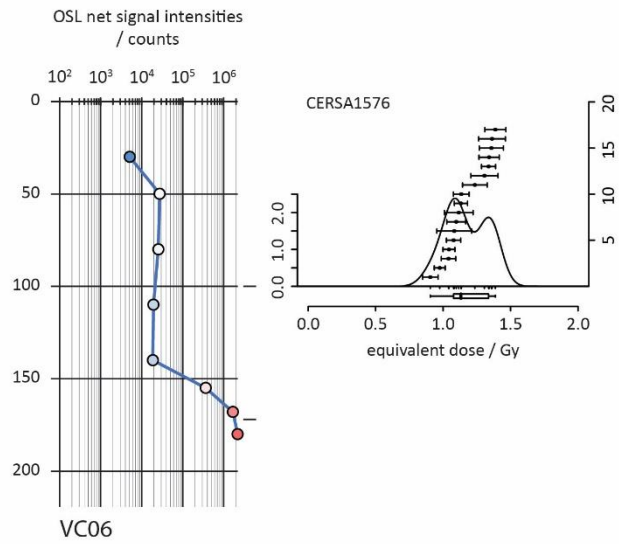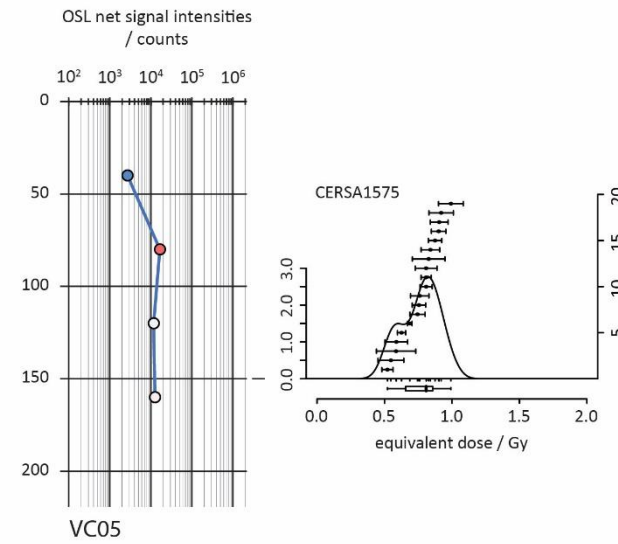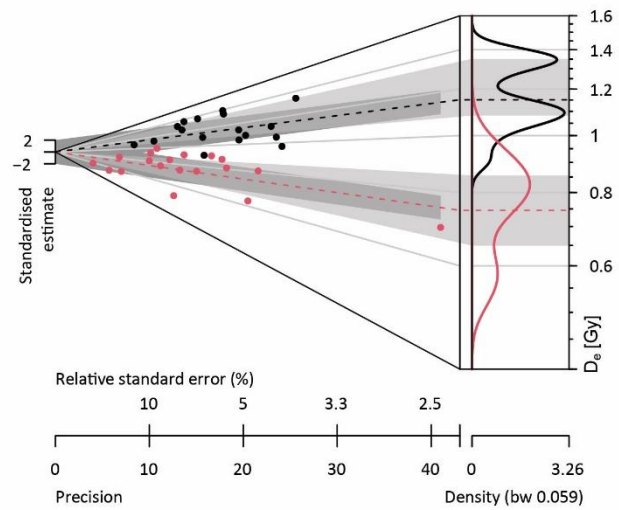

D<sub>e</sub> distribution  
 n = 17 | CERSA1576  
 n = 19 | CERSA1575

Figure S4: Equivalent dose distributions for CERSA1576 (TP22-VC06-1, western transect) and CERSA1575 (TP22-VC05, central transect) as individual kernel density estimate plots and a combined Abanico Plot.

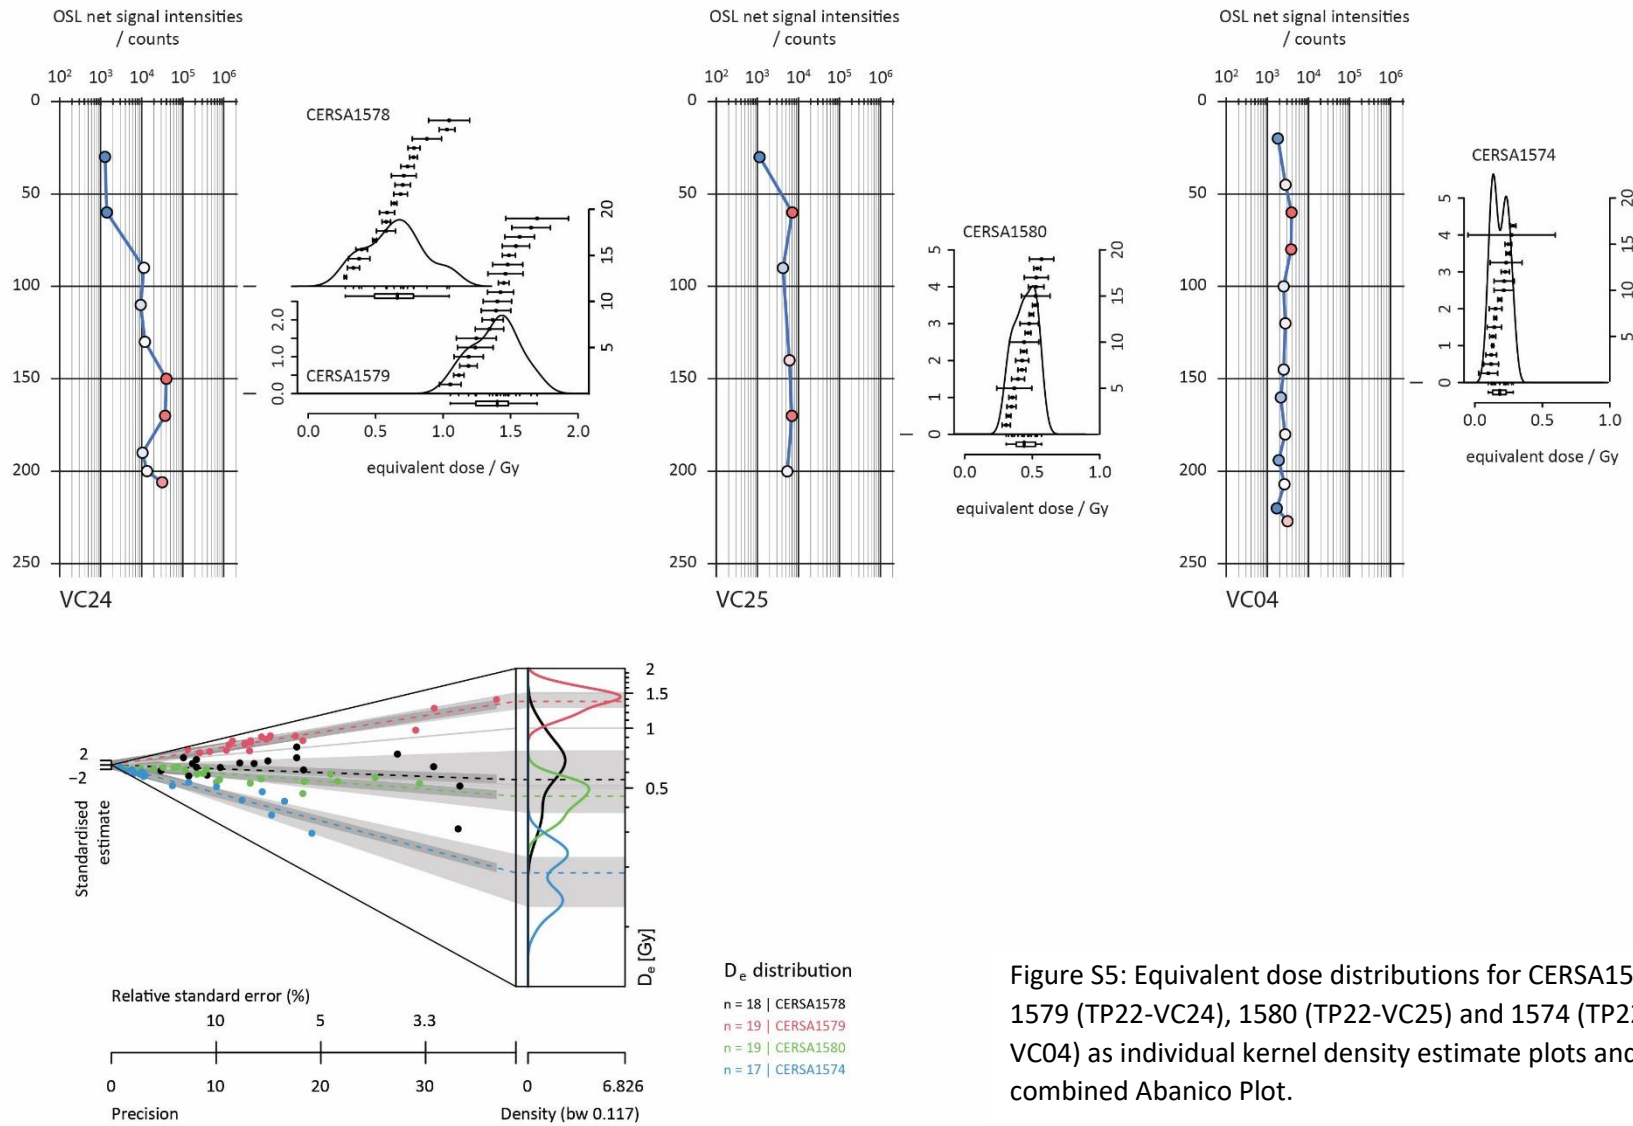

Figure S5: Equivalent dose distributions for CERSA1578, 1579 (TP22-VC24), 1580 (TP22-VC25) and 1574 (TP22-VC04) as individual kernel density estimate plots and a combined Abanico Plot.

## References

- Bell, W.T., 1979. Attenuation factors for the absorbed radiation dose in quartz inclusions for thermoluminescence dating. *Anc. TL* 8, 1–12. <https://doi.org/10.26034/la.atl.1979.022>
- Guérin, G., Christophe, C., Philippe, A., Murray, A.S., Thomsen, K.J., Tribolo, C., Urbanová, P., Jain, M., Guibert, P., Mercier, N., Kreutzer, S., Lahaye, C., 2017. Absorbed dose, equivalent dose, measured dose rates, and implications for OSL age estimates: introducing the Average Dose Model. *Quat. Geochronol.* 41, 163–173. <https://doi.org/10.1016/j.quageo.2017.04.002>
- Guérin, G., Mercier, N., Adamiec, G., 2011. Dose-rate conversion factors: update. *Anc. TL* 29, 5–8. <https://doi.org/10.26034/la.atl.2011.443>
- Guérin, G., Mercier, N., Nathan, R., Adamiec, G., Lefrais, Y., 2012. On the use of the infinite matrix assumption and associated concepts: a critical review. *Radiat. Meas.* 47, 778–785. <https://doi.org/10.1016/j.radmeas.2012.04.004>
- Kolb, T., Tudyka, K., Kadereit, A., Lomax, J., Poręba, G., Zander, A., Zipf, L., Fuchs, M., 2022. The  $\mu$ Dose system: determination of environmental dose rates by combined alpha and beta counting – performance tests and practical experiences. *Geochronology* 4, 1–31. <https://doi.org/10.5194/gchron-4-1-2022>
- Mejdahl, V., 1979. Thermoluminescence dating: beta-dose attenuation in quartz grains. *Archaeometry* 21, 61–72. <https://doi.org/10.1111/j.1475-4754.1979.tb00241.x>
- Prescott, J.R., Hutton, J.T., 1994. Cosmic ray contributions to dose rates for luminescence and ESR dating: large depths and long-term time variations. *Radiat. Meas.* 23, 497–500. [https://doi.org/10.1016/1350-4487\(94\)90086-8](https://doi.org/10.1016/1350-4487(94)90086-8)
- Tudyka, K., Miłosz, S., Adamiec, G., Bluszcz, A., Poręba, G., Paszkowski, Ł., Kolarczyk, A., 2018.  $\mu$ Dose: a compact system for environmental radioactivity and dose rate measurement. *Radiat. Meas.* 118, 8–13. <https://doi.org/10.1016/j.radmeas.2018.07.016>
